# Supplementary material
Source: PubMed Central journal article supplement (PMC3041965)
Supplement: NIHMS247702-supplement-1_si_001.pdf [file NIHMS247702-supplement-1_si_001.pdf]

## Supporting Information

### **Chelate-Assisted Oxidative Coupling Reaction of Arylamides and Unactivated Alkenes: Mechanistic Evidence for Vinyl C–H Bond Activation Promoted by an Electrophilic Ruthenium-Hydride Catalyst**

Ki-Hyeok Kwon, Do W. Lee and Chae S. Yi\*

*Department of Chemistry, Marquette University, Milwaukee, Wisconsin 53201-1881*

|                                                                             |     |
|-----------------------------------------------------------------------------|-----|
| General Information                                                         | S2  |
| Catalyst Survey (Table S1)                                                  | S2  |
| Representative Procedure of the Catalytic Reaction                          | S3  |
| Synthesis of <b>5</b>                                                       | S3  |
| Synthesis of <b>6</b>                                                       | S4  |
| Deuterium Isotope Effect Study (Figure S1)                                  | S5  |
| Deuterium Labeling Study (Figure S2)                                        | S7  |
| Carbon Isotope Effect Study (Table S2)                                      | S9  |
| VT NMR Study (Figure S3)                                                    | S10 |
| Characterization Data of Organic Products                                   | S11 |
| X-Ray Crystallographic Data of <b>6</b> (Table S3-S9)                       | S17 |
| <sup>1</sup> H and <sup>13</sup> C NMR Spectra of Selected Organic Products | S38 |

**General Information.** All operations were carried out in an inert-atmosphere glove box or by using standard high vacuum and Schlenk techniques unless otherwise noted. Tetrahydrofuran, benzene, toluene, chlorobenzene and Et<sub>2</sub>O were distilled from purple solutions of sodium and benzophenone. Dichloromethane and *n*-hexanes were distilled over CaH<sub>2</sub>. The NMR solvents were dried from activated molecular sieves (4 Å). The <sup>1</sup>H, <sup>2</sup>H, <sup>13</sup>C and <sup>31</sup>P NMR spectra were recorded on a Varian 300 or 400 MHz FT-NMR spectrometer. Mass spectra were recorded from a Agilent 6850 GC/MS spectrometer. The conversion of organic products was measured from a Hewlett-Packard HP 6890 GC spectrometer. FT-IR spectra were recorded on Perkin Elmer Spectrum 100. Elemental analysis was performed at the Midwest Microlab, Indianapolis, IN.

**General Procedure for Catalyst Survey.** In a glove box, catalyst (25 μmol, 5 mol %), *N,N*-dimethylbenzamide (75 mg, 0.5 mmol) and cyclopentene (170 mg, 2.5 mmol) were dissolved in CH<sub>2</sub>Cl<sub>2</sub> (2 mL) in a 25 mL Schlenk tube equipped with a Teflon screw cap stopcock and a magnetic stirring bar. The tube was brought out of the box, and was stirred for 5 h in an oil bath set at 80 °C. After the tube was cooled to room temperature, the solution was filtered through a short silica plug (hexanes/EtOAc = 2:1) in air, and the filtrate was analyzed by GC.

**Table S1.** Catalyst Survey for the Coupling reaction of *N,N*-Dimethylbenzamide and Cyclopentene.<sup>a</sup>

| entry | catalyst                                                      | additive                           | <b>2a:3a</b> | yield <sup>b</sup> |
|-------|---------------------------------------------------------------|------------------------------------|--------------|--------------------|
| 1     | <b>1</b>                                                      |                                    | 88:12        | 52                 |
| 2     | <b>1</b>                                                      | HBF <sub>4</sub> ·OEt <sub>2</sub> | 80:20        | 48                 |
| 3     | [RuH(CO)(PCy <sub>3</sub> ) <sub>4</sub> (O)(OH) <sub>2</sub> | HBF <sub>4</sub> ·OEt <sub>2</sub> | 84:16        | 52                 |
| 4     | RuHCl(CO)(PCy <sub>3</sub> ) <sub>2</sub>                     | HBF <sub>4</sub> ·OEt <sub>2</sub> |              | 0                  |
| 5     | RuH <sub>2</sub> (CO)(PPh <sub>3</sub> ) <sub>3</sub>         | HBF <sub>4</sub> ·OEt <sub>2</sub> |              | 0                  |
| 6     | RuCl <sub>2</sub> (PPh <sub>3</sub> ) <sub>3</sub>            | HBF <sub>4</sub> ·OEt <sub>2</sub> |              | 0                  |
| 7     | RuCl <sub>3</sub> ·3H <sub>2</sub> O                          | HBF <sub>4</sub> ·OEt <sub>2</sub> |              | 0                  |
| 8     | RuH <sub>2</sub> (CO)(PPh <sub>3</sub> ) <sub>3</sub>         | HBF <sub>4</sub> ·OEt <sub>2</sub> |              | 0                  |
| 9     | Ru <sub>3</sub> (CO) <sub>12</sub>                            | NH <sub>4</sub> PF <sub>6</sub>    |              | 0                  |

|                                                                                                                       |                                    |   |
|-----------------------------------------------------------------------------------------------------------------------|------------------------------------|---|
| 10 <sup>c</sup> [RuH(CO)(PCy <sub>3</sub> ) <sub>2</sub> (S) <sub>2</sub> ] <sup>+</sup> BF <sub>4</sub> <sup>-</sup> |                                    | 0 |
| 11 Re(CO) <sub>3</sub> (THF) <sub>2</sub> Br                                                                          | HBf <sub>4</sub> ·OEt <sub>2</sub> | 0 |
| 12 Au(PPh <sub>3</sub> ) <sub>3</sub> Cl                                                                              | HBf <sub>4</sub> ·OEt <sub>2</sub> | 0 |
| 13 HBF <sub>4</sub> ·OEt <sub>2</sub>                                                                                 |                                    | 0 |
| 14 Cy <sub>3</sub> PH <sup>+</sup> BF <sub>4</sub> <sup>-</sup>                                                       |                                    | 0 |

<sup>a</sup>Reaction conditions: *N,N*-dimethylbenzamide (75 mg, 0.5 mmol), cyclopentene (170 mg, 2.5 mmol), catalyst (5 mol %), CH<sub>2</sub>Cl<sub>2</sub> (2 mL), 80 °C, 5 h. <sup>b</sup>The conversion of *N,N*-dimethylbenzamide as determined by GC. <sup>c</sup>S = CH<sub>3</sub>CN.

**Representative Procedure of the Catalytic Reaction.** In a glove box, complex **1** (15 mg, 25 μmol), an arylamide (0.5 mmol) and an alkene (2.5 mmol) were dissolved in CH<sub>2</sub>Cl<sub>2</sub> (2 mL) in a 25 mL Schlenk tube equipped with a Teflon screw cap stopcock and a magnetic stirring bar. The tube was brought out of the box, and was stirred for 5 h in an oil bath set at 80 °C (chlorobenzene was used for the reaction temperature at 100-130 °C). After the tube was cooled to room temperature, the solution was filtered through a short silica plug (hexanes/EtOAc = 2:1) in air, and the filtrate was analyzed by GC. Typically, the product mixture of **2** and **3** was not separable by column chromatography, and was subjected to the hydrogenation reaction to obtain isolated yield of the products. The treatment of the crude product mixture with H<sub>2</sub> (1 atm) in the presence of **1** (15 mg, 5 mol %) in chlorobenzene at 110 °C for 2 h led to the clean formation of the hydrogenated product **3**. Analytically pure organic product was isolated after a column chromatography on silica gel (hexanes/EtOAc).

[(C<sub>10</sub>H<sub>7</sub>CONMe<sub>2</sub>)RuH(CO)(PCy<sub>3</sub>)<sub>3</sub>]<sup>+</sup>BF<sub>4</sub><sup>-</sup> (**5**). In a glove box, {[ (PCy<sub>3</sub>)(CO)RuH]<sub>4</sub>(μ<sub>4</sub>-O)(μ<sub>3</sub>-OH)(μ<sub>2</sub>-OH)}, (200 mg, 0.12 mmol) and *N,N*-dimethyl-2-naphthamide were dissolved in CH<sub>2</sub>Cl<sub>2</sub> (5 mL) in a 25 mL Schlenk tube equipped with a Teflon screw cap stopcock and a magnetic stirring bar. The tube was brought out of the box, and HBF<sub>4</sub>·OEt<sub>2</sub> (64 μL, 0.48 mmol) was added under N<sub>2</sub> stream. The color of the solution was changed from dark red to green immediately. After stirring for 1 h at room temperature, the solvent was removed under vacuum,

and the residue was crashed by adding hexanes (10 mL). Filtering the resulting solid through a fritted funnel and recrystallization from CH<sub>2</sub>Cl<sub>2</sub>/hexanes yielded the product as a light green powder (210 mg, ca. 60% yield, estimated purity by <sup>1</sup>H NMR ~80%; contained 2 other minor isomers (~20%)).

Spectroscopic data for the major isomer of **5**: <sup>1</sup>H NMR (CD<sub>2</sub>Cl<sub>2</sub>, 400 MHz) δ 7.9-7.4 (m, 7H, Ar), 3.2 and 3.0 (s, 3H, N(CH<sub>3</sub>)<sub>2</sub>), 2.0-1.2 (m, PCy<sub>3</sub>), -21.7 (br, Ru-H); <sup>13</sup>C{<sup>1</sup>H} NMR (CD<sub>2</sub>Cl<sub>2</sub>, 100.5 MHz) δ 197.6 (d, *J*<sub>CP</sub> = 18.2 Hz, Ru-CO), 178.7 (CON(CH<sub>3</sub>)<sub>2</sub>), 134.8, 132.9, 129.6, 129.2, 128.9, 128.4, 128.0 and 123.9 (Ar), 38.9 (N(CH<sub>3</sub>)<sub>2</sub>), 38.6 (CH), 35.1 (N(CH<sub>3</sub>)<sub>2</sub>), 32.1, 30.9, 30.4, 29.9, 28.0, 26.8, 26.2 (CH<sub>2</sub>); <sup>31</sup>P{<sup>1</sup>H} NMR (CD<sub>2</sub>Cl<sub>2</sub>, 161.8 MHz) δ 74.4 (PCy<sub>3</sub>); IR (CD<sub>2</sub>Cl<sub>2</sub>) ν<sub>CO</sub> = 1930, 1585 cm<sup>-1</sup>.

**[(C<sub>15</sub>H<sub>13</sub>CONMe<sub>2</sub>)RuH(CO)(PCy<sub>3</sub>)]<sup>+</sup>BF<sub>4</sub><sup>-</sup> (**6**). In a glove box, complex **5** (100 mg, 0.14 mmol) and cyclopentene (100 mg, 1.5 mmol) were dissolved in CH<sub>2</sub>Cl<sub>2</sub> (5 mL) in a 25 mL Schlenk tube equipped with a Teflon screw cap stopcock and a magnetic stirring bar. The color of the solution was changed from green to orange immediately. After stirring for 1 h at room temperature, the solvent was removed under vacuum, and *n*-hexanes (10 mL) was added to the residue. The resulting solid was filtered through a fritted funnel and recrystallized from CH<sub>2</sub>Cl<sub>2</sub>/hexanes to yield the product as a pale yellow powder (90 mg, 82% yield). Single crystals of **6** suitable for X-ray crystallography were obtained from CH<sub>2</sub>Cl<sub>2</sub>/*n*-pentane solution.**

For **6**: <sup>1</sup>H NMR (CD<sub>2</sub>Cl<sub>2</sub>, 400.0 MHz) δ 8.45 (s, 1H, Ar), 8.06 (m, 1H, Ar), 7.94 (m, 2H, Ar), 7.72 (m, 2H, Ar), 5.5 (s, CCHCH<sub>2</sub>) 3.4 (s, 3H, N(CH<sub>3</sub>)<sub>2</sub>), 3.3 (m, 1H, CH<sub>2</sub>), 3.2 (s, 3H, N(CH<sub>3</sub>)<sub>2</sub>), 3.1 (m, 1H, CH<sub>2</sub>), 2.8 (m, 2H, CH<sub>2</sub>), 2.0-1.8 (br, 6H, PCy<sub>3</sub>), 1.8 (m, 2H, CH<sub>2</sub>), 1.8-0.6 (br, 27H, PCy<sub>3</sub>), -19.6 (d, *J*<sub>PH</sub> = 21.8 Hz, Ru-H); <sup>13</sup>C{<sup>1</sup>H} NMR (CD<sub>2</sub>Cl<sub>2</sub>, 100.5 MHz) δ 201.2 (d, *J*<sub>CP</sub> = 15.4 Hz, Ru-CO), 174.3 (CON(CH<sub>3</sub>)<sub>2</sub>), 136.4, 135.2, 132.4, 130.7, 130.5, 130.3, 129.4, 129.2, 128.3 and 117.8 (Ar), 115.5 (d, *J*<sub>CP</sub> = 5.1 Hz, Ru-C), 104.7 (d, *J*<sub>CP</sub> = 11.6 Hz, Ru-C), 42.4 (N(CH<sub>3</sub>)<sub>2</sub>), 37.6 and 37.5 (CH<sub>2</sub>), 37.3 (N(CH<sub>3</sub>)<sub>2</sub>), 34.6 and 34.4 (CH), 30.4, 30.0, 28.1, 28.0, 27.9, 27.8, 26.4 and 21.0 (CH<sub>2</sub>); <sup>31</sup>P{<sup>1</sup>H} NMR (CD<sub>2</sub>Cl<sub>2</sub>, 161.8 MHz) δ 65.4 (PCy<sub>3</sub>); IR (CD<sub>2</sub>Cl<sub>2</sub>) ν<sub>CO</sub>

= 1948, 1600  $\text{cm}^{-1}$ ; Anal. Calcd for  $\text{C}_{38}\text{H}_{55}\text{BCl}_2\text{F}_4\text{NO}_2\text{PRu}$ : C, 53.85; H, 6.54. Found: C, 53.51; H, 6.48.

**Deuterium Isotope Effect Study.** In a glove box, complex **1** (17 mg, 30  $\mu\text{mol}$ ), *N,N*-diethylbenzamide (177 mg, 1.0 mmol) or *N,N*-diethylbenzamide- $d_5$  (182 mg, 1.0 mmol) and cyclopentene (0.09 g, 5 mmol) were dissolved in  $\text{CH}_2\text{Cl}_2$  (5.0 mL) in a 25 mL Schlenk tube equipped with a Teflon screw cap stopcock and a magnetic stirring bar. After stirring at room temperature for 10 min, an equal amount of the solution (1.4 mL) was divided and placed into 5 different Schlenk tubes. The tubes were brought out of the box, and were stirred for 25 min in an oil bath set at 80  $^\circ\text{C}$ . Each reaction tube was taken out from the oil bath in 5 min intervals, and was immediately cooled in a dry ice/acetone bath. After filtering through a small silica gel column (hexanes/EtOAc = 2:1), the solution was analyzed by GC. The  $k_{\text{obs}}$  was determined from a first-order plot of  $\ln[2\mathbf{e} + 3\mathbf{e}]$  vs time as measured by the appearance of the products **2e** and **3e** by GC (Figure S1).

**Figure S1.** First-Order Plot of  $-\ln[\text{C}_6\text{H}_5\text{CONEt}_2]_t/[\text{C}_6\text{H}_5\text{CONEt}_2]_0$  vs Time for the Coupling Reaction.

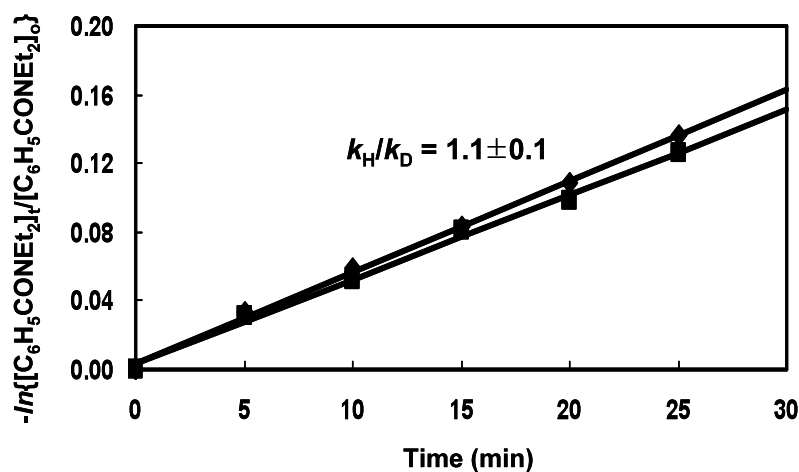

◆  $\text{C}_6\text{H}_5\text{CONEt}_2$ , ■  $\text{C}_6\text{D}_5\text{CONEt}_2$

**Deuterium Labeling Study.** In a glove box, complex **1** (15 mg, 25  $\mu$ mol), *N,N*-diethylbenzamide- $d_5$  (91 mg, 0.50 mmol) and cyclopentene (0.17 g, 2.5 mmol) were dissolved in  $\text{CH}_2\text{Cl}_2$  (2 mL) in a 25 mL Schlenk tube equipped with a Teflon screw cap stopcock and a magnetic stirring bar. The tube was brought out of the box, and was stirred for 1 h in an oil bath set at 80  $^\circ\text{C}$ . The tube was immediately cooled and was open to air. After filtering through a short silica gel column (hexanes/EtOAc = 2:1), the conversion was determined by GC. Both unreacted cyclopentene- $d_n$  and cyclopentane- $d_n$  were collected separately via a vacuum transfer. The product mixture of **2e**- $d_n$  and **3e**- $d_n$  and unreacted *N,N*-diethylbenzamide- $d_n$  was separated by a column chromatography on silica gel (hexanes/EtOAc), and each was analyzed by both  $^1\text{H}$  and  $^2\text{H}$  NMR (Figure S2).

**Figure S2.**  $^1\text{H}$  and  $^2\text{H}$  NMR Spectra of the Coupling Reaction of *N,N*-Diethylbenzamide- $d_5$  and Cyclopentene.

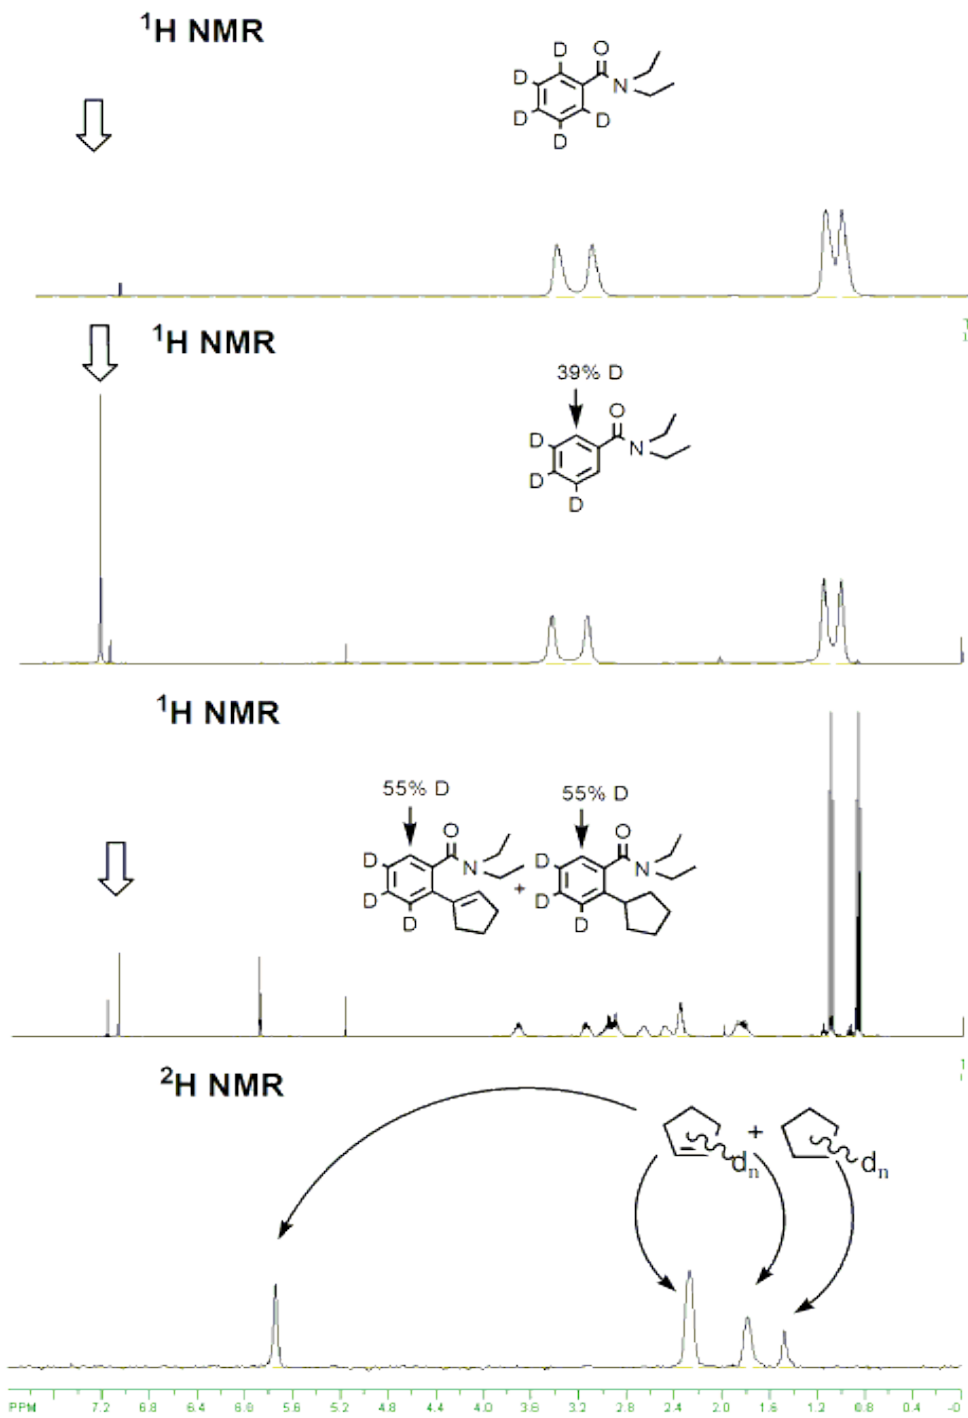

**Carbon Isotope Effect Study.** In a glove box, complex **1** (0.23 g, 0.4 mmol), *N,N*-diethylbenzamide (1.4 g, 8.0 mmol) and cyclopentene (2.72 g, 0.04 mol) were dissolved in CH<sub>2</sub>Cl<sub>2</sub> (32 mL) in a 100 mL Schlenk tube equipped with a Teflon screw cap stopcock and a magnetic stirring bar. The tube was brought out of the box, and was stirred in an oil bath at 80 °C for 5 h. The tube was allowed to cool to room temperature and was open to air. After filtering through a small silica column (hexanes/EtOAc = 2:1), the conversion was determined by GC (78%, 80% and 82% conversion). Unreacted *N,N*-diethylbenzamide was separated by a column chromatography on silica gel (hexanes/EtOAc) for <sup>13</sup>C{<sup>1</sup>H} NMR analysis.

The <sup>13</sup>C NMR analysis of the recovered and virgin samples of *N,N*-diethylbenzamide was performed by following Singleton's <sup>13</sup>C NMR method (ref. 9 in the main text). The NMR sample of virgin and recovered *N,N*-diethylbenzamide was prepared identically by dissolving *N,N*-diethylbenzamide (100 mg) in DMSO-*d*<sub>8</sub> (0.5 mL) in a 5 mm high precision NMR tube. The <sup>13</sup>C{<sup>1</sup>H} NMR spectra were recorded with H-decoupling and 45 degree pulses. A 60 s delay between pulses was imposed to minimize *T*<sub>1</sub> variations (d1 = 60 s, at = 5.0 s, np = 245098, nt = 706). The data are summarized in Table S2.



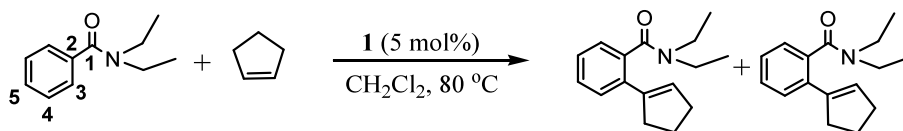

**Table S2.** Average  $^{13}\text{C}$  Integration of the Recovered and Virgin Samples of *N,N*-Diethylbenzamide.

| C #      | virgin       | recovered<br>(78 % conv.) | recovered/virgin | change (%)  |
|----------|--------------|---------------------------|------------------|-------------|
| 1        | 1.034        | 1.041                     | 1.007            | 0.70        |
| 2(ref)   | 1.000        | 1.000                     | 1.000            | 0.00        |
| <b>3</b> | <b>1.975</b> | <b>2.020</b>              | <b>1.023</b>     | <b>2.27</b> |
| 4        | 1.986        | 1.985                     | 0.999            | -0.10       |
| 5        | 0.956        | 0.954                     | 0.998            | -0.20       |

  

| C #      | virgin       | recovered<br>(80 % conv.) | recovered/virgin | change (%)  |
|----------|--------------|---------------------------|------------------|-------------|
| 1        | 1.034        | 1.041                     | 1.007            | 0.70        |
| 2(ref)   | 1.000        | 1.000                     | 1.000            | 0.00        |
| <b>3</b> | <b>1.975</b> | <b>2.024</b>              | <b>1.023</b>     | <b>2.48</b> |
| 4        | 1.986        | 1.984                     | 0.999            | -0.10       |
| 5        | 0.956        | 0.957                     | 1.001            | 0.10        |

  

| C #      | virgin       | recovered<br>(82 % conv.) | recovered/virgin | change (%)  |
|----------|--------------|---------------------------|------------------|-------------|
| 1        | 1.034        | 1.041                     | 1.007            | 0.70        |
| 2(ref)   | 1.000        | 1.000                     | 1.000            | 0.00        |
| <b>3</b> | <b>1.975</b> | <b>2.023</b>              | <b>1.024</b>     | <b>2.43</b> |
| 4        | 1.986        | 1.988                     | 1.001            | 0.10        |
| 5        | 0.956        | 0.953                     | 0.997            | -0.30       |

**VT NMR Study for the Reaction of 1 with *N,N*-dimethyl-2-naphthamide.** In a glove box, complex **1** (50 mg, 87  $\mu\text{mol}$ ) and *N,N*-dimethyl-2-naphthamide (17 mg, 87  $\mu\text{mol}$ ) were dissolved in  $\text{CD}_2\text{Cl}_2$  (0.5 mL) in a heavy-walled J-Young NMR tube. The tube was allowed to equilibrate for 30 min before the NMR analysis. The sample tube was inserted into the NMR probe. The equilibrium constants were determined from the phosphorus integration of **1** and **5** by  $^{31}\text{P}$  NMR in the temperature range 30 to 60  $^\circ\text{C}$  (10  $^\circ\text{C}$  intervals). The sample was allowed to equilibrate for 10-15 min at each temperature prior to the data acquisition. The van't Hoff plots led to the thermodynamic values for  $\Delta H^\circ = 0.6 \pm 0.1$  kcal/mol and  $\Delta S^\circ = -0.5 \pm 0.1$  e.u. (Figure S3).

**Figure S3.** van't Hoff Plot of  $\ln K$  vs  $1/T$

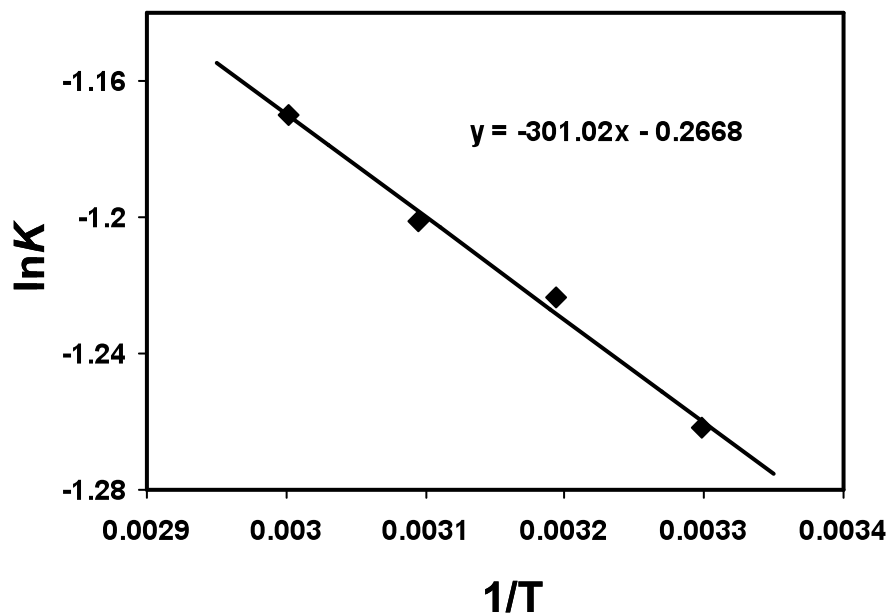

### Characterization Data of Organic Products

For **3a**:  $^1\text{H}$  NMR (400 MHz,  $\text{CDCl}_3$ )  $\delta$  7.23, 7.09 and 7.01 (Ar), 3.04 (s, 3H,  $\text{N}(\text{CH}_3)_2$ ), 2.90 (m, ArCH), 2.72 (s, 3H,  $\text{N}(\text{CH}_3)_2$ ), 2.0-1.4 (br, 8H,  $\text{CH}_2$ );  $^{13}\text{C}\{^1\text{H}\}$  NMR (100 MHz,  $\text{CDCl}_3$ )  $\delta$  171.7 (CO), 142.8, 136.4, 128.9, 126.3, 125.7 and 125.4 (Ar), 42.3 (ArCH), 38.9 ( $\text{N}(\text{CH}_3)_2$ ), 35.4 ( $\text{CH}_2$ ), 34.5 ( $\text{CH}_2$ ), 34.4 ( $\text{N}(\text{CH}_3)_2$ ), 25.7 ( $\text{CH}_2$ ); GC-MS  $m/z$  = 217 ( $\text{M}^+$ ); Anal. Calcd for  $\text{C}_{14}\text{H}_{19}\text{NO}$ : C, 77.38; H, 8.81. Found: C, 77.49; H, 8.70.

For **3b**:  $^1\text{H}$  NMR (400 MHz,  $\text{CDCl}_3$ )  $\delta$  6.96, 6.77 and 6.64 (Ar), 3.70 (s, 3H,  $\text{OCH}_3$ ), 3.02 (s, 3H,  $\text{N}(\text{CH}_3)_2$ ), 2.92 (m, ArCH), 2.74 (s, 3H,  $\text{N}(\text{CH}_3)_2$ ), 1.9-1.4 (br, 8H,  $\text{CH}_2$ );  $^{13}\text{C}\{^1\text{H}\}$  NMR (100 MHz,  $\text{CDCl}_3$ )  $\delta$  171.6 (CO), 159.8, 144.8, 129.0, 126.8, 112.0 and 110.6 (Ar), 55.0 ( $\text{OCH}_3$ ), 42.3 (ArCH), 38.9 ( $\text{N}(\text{CH}_3)_2$ ), 35.0 ( $\text{CH}_2$ ), 34.5 ( $\text{N}(\text{CH}_3)_2$ ), 34.4 ( $\text{CH}_2$ ), 25.6 ( $\text{CH}_2$ ); GC-MS  $m/z$  = 247 ( $\text{M}^+$ ); Anal. Calcd for  $\text{C}_{15}\text{H}_{21}\text{NO}_2$ : C, 72.84; H, 8.56. Found: C, 72.68; H, 8.55.

For **3c**:  $^1\text{H}$  NMR (400 MHz,  $\text{CDCl}_3$ )  $\delta$  7.23, 7.07 and 6.98 (Ar), 3.02 (s, 3H,  $\text{N}(\text{CH}_3)_2$ ), 2.91 (m, ArCH), 2.72 (s, 3H,  $\text{N}(\text{CH}_3)_2$ ), 2.0-1.4 (br, 8H,  $\text{CH}_2$ );  $^{13}\text{C}\{^1\text{H}\}$  NMR (100 MHz,  $\text{CDCl}_3$ )  $\delta$  170.5 (CO), 145.5, 134.8, 134.6, 126.9, 126.6 and 125.8 (Ar), 42.1 (ArCH), 38.7 ( $\text{N}(\text{CH}_3)_2$ ), 35.2 ( $\text{CH}_2$ ), 34.4 ( $\text{N}(\text{CH}_3)_2$ ), 34.3 ( $\text{CH}_2$ ), 25.6 ( $\text{CH}_2$ ); GC-MS  $m/z$  = 251 ( $\text{M}^+$ ); Anal. Calcd for  $\text{C}_{14}\text{H}_{18}\text{ClNO}$ : C, 66.79; H, 7.21. Found: C, 66.83; H, 7.30.

For **3d**:  $^1\text{H}$  NMR (400 MHz,  $\text{CDCl}_3$ )  $\delta$  7.21, 7.05 and 6.98 (Ar), 6.28 (d,  $J$  = 3.9 Hz NH), 3.18 (m, ArCH), 2.71 (d,  $J$  = 4.9, Hz,  $\text{NHCH}_3$ ), 2.0-1.4 (br, 8H,  $\text{CH}_2$ );  $^{13}\text{C}\{^1\text{H}\}$  NMR (100 MHz,  $\text{CDCl}_3$ )  $\delta$  171.5 (CO), 144.3, 140.0, 129.7, 126.41, 126.40 and 125.4 (Ar), 41.8 (ArCH), 35.1 ( $\text{CHCH}_2$ ), 26.5 ( $\text{NCH}_3$ ), 25.8 ( $\text{CH}_2$ ); GC-MS  $m/z$  = 203 ( $\text{M}^+$ ); Anal. Calcd for  $\text{C}_{13}\text{H}_{17}\text{NO}$ : C, 76.81; H, 8.43. Found: C, 76.58; H, 8.18.

For **3e**:  $^1\text{H}$  NMR (400 MHz,  $\text{CDCl}_3$ )  $\delta$  7.23, 7.07 and 7.02 (Ar), 3.68 (m, H,  $\text{N}(\text{CH}_2\text{CH}_3)_2$ ), 3.37 (m, H,  $\text{N}(\text{CH}_2\text{CH}_3)_2$ ), 3.03 (m, 2H,  $\text{N}(\text{CH}_2\text{CH}_3)_2$ ), 2.92 (m, ArCH), 2.0-1.4 (br, 8H,  $\text{CH}_2$ ),

1.15 (t,  $J = 6.8$  Hz,  $\text{CH}_2\text{CH}_3$ ), 0.93 (t,  $J = 6.8$  Hz,  $\text{CH}_2\text{CH}_3$ );  $^{13}\text{C}\{^1\text{H}\}$  NMR (100 MHz,  $\text{CDCl}_3$ )  $\delta$  170.9 (CO), 142.6, 136.8, 128.7, 126.1, 125.5, and 125.1 (Ar), 42.7 ( $\text{N}(\text{CH}_2\text{CH}_3)_2$ ), 42.2 (ArCH), 38.4 ( $\text{N}(\text{CH}_2\text{CH}_3)_2$ ), 35.5 ( $\text{CH}_2$ ), 34.4 ( $\text{CH}_2$ ), 25.8 ( $\text{CH}_2$ ), 25.6 ( $\text{CH}_2$ ), 13.8 ( $\text{N}(\text{CH}_2\text{CH}_3)_2$ ), 12.6 ( $\text{N}(\text{CH}_2\text{CH}_3)_2$ ); GC-MS  $m/z = 245$  ( $\text{M}^+$ ); Anal. Calcd for  $\text{C}_{16}\text{H}_{22}\text{NO}$ : C, 78.32; H, 9.45. Found: C, 78.10; H, 9.23.

For **3f**:  $^1\text{H}$  NMR (400 MHz,  $\text{CDCl}_3$ )  $\delta$  7.3-7.1 (Ar), 6.97 (m, 1H, Ar), 6.35 (br, NH), 4.38 (m, 2H,  $\text{NHCH}_2\text{Ar}$ ), 3.17 (m, ArCH), 1.9-1.3 (br, 8H,  $\text{CH}_2$ );  $^{13}\text{C}\{^1\text{H}\}$  NMR (100 MHz,  $\text{CDCl}_3$ )  $\delta$  170.5 (CO), 144.2, 138.3, 136.8, 129.8, 128.6, 127.7, 127.4, 126.5, 126.4 and 125.4 (Ar), 43.6 ( $\text{CH}_2\text{Ar}$ ), 41.8 (ArCH), 35.1 ( $\text{CH}_2$ ), 25.7 ( $\text{CH}_2$ ); GC-MS  $m/z = 279$  ( $\text{M}^+$ ); Anal. Calcd for  $\text{C}_{19}\text{H}_{21}\text{NO}$ : C, 81.68; H, 7.58. Found: C, 81.72; H, 7.38.

For **3g**:  $^1\text{H}$  NMR (400 MHz,  $\text{CDCl}_3$ )  $\delta$  7.66 (s, NH), 7.48, 7.28 and 7.05 (Ar), 3.30 (m, ArCH), 1.98 (br, 2H,  $\text{CH}_2$ ), 1.7-1.5 (br, 6H,  $\text{CH}_2$ );  $^{13}\text{C}\{^1\text{H}\}$  NMR (100 MHz,  $\text{CDCl}_3$ )  $\delta$  168.8 (CO), 144.8, 138.2, 137.1, 130.4, 129.2, 126.9, 126.5, 125.7, 124.5 and 119.9 (Ar), 42.0 (ArCH), 35.3 ( $\text{CH}_2$ ), 25.9 ( $\text{CH}_2$ ); GC-MS  $m/z = 265$  ( $\text{M}^+$ ); Anal. Calcd for  $\text{C}_{18}\text{H}_{19}\text{NO}_2$ : C, 81.47; H, 7.22. Found: C, 81.61; H, 7.11.

For **3h**:  $^1\text{H}$  NMR (400 MHz,  $\text{CDCl}_3$ )  $\delta$  7.45 (Ar), 7.35 (br, NH), 7.33, 7.15 and 6.84 (Ar), 3.73 (s,  $\text{OCH}_3$ ), 3.34 (m, ArCH), 2.05 (br, 2H,  $\text{CH}_2$ ), 1.8-1.5 (br, 6H,  $\text{CH}_2$ );  $^{13}\text{C}\{^1\text{H}\}$  NMR (100 MHz,  $\text{CDCl}_3$ )  $\delta$  168.7 (CO), 156.7, 144.9, 137.2, 131.3, 130.4, 127.0, 126.5, 125.8, 121.8 and 114.4 (Ar), 55.5 ( $\text{OCH}_3$ ), 42.0 (ArCH), 35.4 ( $\text{CH}_2$ ), 26.0 ( $\text{CH}_2$ ); GC-MS  $m/z = 295$  ( $\text{M}^+$ ); Anal. Calcd for  $\text{C}_{19}\text{H}_{21}\text{NO}_2$ : C, 77.26; H, 7.17. Found: C, 77.05; H, 7.02.

For **3i**:  $^1\text{H}$  NMR (400 MHz,  $\text{CDCl}_3$ )  $\delta$  7.87 (s, NH), 7.39, 7.29 and 7.16 (Ar), 7.05 (m, 1H, Ar), 3.25 (m, ArCH), 1.94 (br, 2H,  $\text{CH}_2$ ), 1.7-1.5 (br, 6H,  $\text{CH}_2$ );  $^{13}\text{C}\{^1\text{H}\}$  NMR (100 MHz,  $\text{CDCl}_3$ )  $\delta$  169.1 (CO), 144.7, 136.8, 136.6, 130.4, 129.3, 129.0, 126.9, 126.4, 125.7 and 121.3

(Ar), 42.0 (ArCH), 35.2 (CH<sub>2</sub>), 25.9 (CH<sub>2</sub>); GC-MS *m/z* = 299 (M<sup>+</sup>); Anal. Calcd for C<sub>18</sub>H<sub>18</sub>ClNO: C, 72.11; H, 6.05. Found: C, 71.84; H, 6.10.

For **3j**: <sup>1</sup>H NMR (400 MHz, CDCl<sub>3</sub>) δ 7.2-7.1 and 7.01 (Ar), 6.17 (br, NH), 4.45 (d, *J* = 6.0 Hz, NHCH<sub>2</sub>Ar), 2.95 (m, ArCH), 1.73 (m, 2H, CH<sub>2</sub>), 1.6-1.3 (m, 10H, CH<sub>2</sub>); <sup>13</sup>C{<sup>1</sup>H} NMR (100 MHz, CDCl<sub>3</sub>) δ 170.5 (CO), 147.6, 138.5, 135.5, 130.0, 128.8, 128.0, 127.6, 126.9, 126.4 and 125.4 (Ar), 43.8 (CH<sub>2</sub>Ar), 42.3 (ArCH), 36.9 (CH<sub>2</sub>), 27.8 (CH<sub>2</sub>), 27.4 (CH<sub>2</sub>); GC-MS *m/z* = 307 (M<sup>+</sup>); Anal. Calcd for C<sub>18</sub>H<sub>21</sub>NO: C, 82.04; H, 8.20. Found: C, 82.01; H, 7.99.

For **3k**: <sup>1</sup>H NMR (400 MHz, CDCl<sub>3</sub>) δ 7.27, 7.10 and 7.03 (Ar), 3.07 (s, 3H, N(CH<sub>3</sub>)<sub>2</sub>), 2.77 (s, 3H, N(CH<sub>3</sub>)<sub>2</sub>), 2.74 (m, ArCH), 1.8-1.5 (br, 14H, CH<sub>2</sub>); <sup>13</sup>C{<sup>1</sup>H} NMR (100 MHz, CDCl<sub>3</sub>) δ 171.7 (CO), 146.4, 135.3, 128.9, 126.9, 125.6 and 125.4 (Ar), 40.0 (ArCH), 38.8 (N(CH<sub>3</sub>)<sub>2</sub>), 35.3 (CH<sub>2</sub>), 34.5 (N(CH<sub>3</sub>)<sub>2</sub>), 26.8 (CH<sub>2</sub>), 26.7 (CH<sub>2</sub>), 26.6 (CH<sub>2</sub>), 26.5 (CH<sub>2</sub>), 25.6 (CH<sub>2</sub>); GC-MS *m/z* = 259 (M<sup>+</sup>); Anal. Calcd for C<sub>17</sub>H<sub>25</sub>NO: C, 78.72; H, 9.71. Found: C, 78.67; H, 9.67.

For **3l**: <sup>1</sup>H NMR (400 MHz, CDCl<sub>3</sub>) δ 7.3-7.0 (Ar), 3.02 (s, 3H, N(CH<sub>3</sub>)<sub>2</sub>), 2.71 (s, 3H, N(CH<sub>3</sub>)<sub>2</sub>), 2.41 (br, CH<sub>2</sub>CH(CH<sub>3</sub>)<sub>2</sub>), 1.81 (m, CH<sub>2</sub>CH(CH<sub>3</sub>)<sub>2</sub>), 0.80 (d, *J* = 6.7 Hz, 6H, CH<sub>3</sub>); <sup>13</sup>C{<sup>1</sup>H} NMR (100 MHz, CDCl<sub>3</sub>) δ 171.4 (CO), 138.0, 136.6, 130.1, 128.5, 126.0, and 125.8 (Ar), 42.2 (CH<sub>2</sub>CH(CH<sub>3</sub>)<sub>2</sub>), 38.7 (N(CH<sub>3</sub>)<sub>2</sub>), 34.5 (N(CH<sub>3</sub>)<sub>2</sub>), 29.3 (CH<sub>2</sub>CH(CH<sub>3</sub>)<sub>2</sub>), 22.6 (CH<sub>2</sub>CH(CH<sub>3</sub>)<sub>2</sub>); GC-MS *m/z* = 205 (M<sup>+</sup>); Anal. Calcd for C<sub>13</sub>H<sub>19</sub>NO: C, 76.06; H, 9.33. Found: C, 75.82; H, 9.34.

For **3m**: <sup>1</sup>H NMR (400 MHz, CDCl<sub>3</sub>) δ 7.3-7.0 (Ar), 3.12 (br, CH<sub>2</sub>CH(CH<sub>3</sub>)Ph), 3.01 (br, 3H, N(CH<sub>3</sub>)<sub>2</sub>), 2.77 (t, *J* = 6.5 Hz, CH<sub>2</sub>CH(CH<sub>3</sub>)Ph), 2.65 (br, 3H, N(CH<sub>3</sub>)<sub>2</sub>), 1.21 (d, *J* = 6.5 Hz, CH<sub>2</sub>CHCH<sub>3</sub>(Ph)); <sup>13</sup>C{<sup>1</sup>H} NMR (100 MHz, CDCl<sub>3</sub>) δ 171.0 (CO), 146.6, 137.2, 136.3, 130.2, 128.3, 128.1, 126.8, 126.0, 125.9 and 125.8 (Ar), 41.9 (CH<sub>2</sub>CHCH<sub>3</sub>(Ph)), 40.8 (CH<sub>2</sub>CHCH<sub>3</sub>(Ph)),

38.3 (N(CH<sub>3</sub>)<sub>2</sub>), 34.3 (N(CH<sub>3</sub>)<sub>2</sub>), 21.4 (CH<sub>3</sub>); GC-MS  $m/z$  = 267 (M<sup>+</sup>); Anal. Calcd for C<sub>18</sub>H<sub>21</sub>NO: C, 80.86; H, 7.92. Found: C, 80.57; H, 7.90.

For **3n**: <sup>1</sup>H NMR (400 MHz, CDCl<sub>3</sub>) δ 7.2-7.0 (Ar), 3.04 (s, 3H, N(CH<sub>3</sub>)<sub>2</sub>), 2.73 (s, 3H, N(CH<sub>3</sub>)<sub>2</sub>), 2.47 (br, CH<sub>2</sub>), 1.5-1.3 (br, CH<sub>2</sub>), 0.82 (s, C(CH<sub>3</sub>)<sub>3</sub>); <sup>13</sup>C{<sup>1</sup>H} NMR (100 MHz, CDCl<sub>3</sub>) δ 171.4 (CO), 139.6, 136.4, 129.5, 128.8, 125.9, and 125.8 (Ar), 45.7 (CH<sub>2</sub>CH<sub>2</sub>C(CH<sub>3</sub>)<sub>2</sub>), 38.8 (N(CH<sub>3</sub>)<sub>2</sub>), 34.5 (N(CH<sub>3</sub>)<sub>2</sub>), 30.5 (CH<sub>2</sub>CH<sub>2</sub>C(CH<sub>3</sub>)<sub>3</sub>), 29.2 (CH<sub>2</sub>CH<sub>2</sub>C(CH<sub>3</sub>)<sub>3</sub>), 28.4 (CH<sub>2</sub>CH<sub>2</sub>C(CH<sub>3</sub>)<sub>2</sub>); GC-MS  $m/z$  = 233 (M<sup>+</sup>); Anal. Calcd for C<sub>15</sub>H<sub>23</sub>NO: C, 77.21; H, 9.93. Found: C, 76.97; H, 10.08.

For **3o**: <sup>1</sup>H NMR (400 MHz, CDCl<sub>3</sub>) δ 7.63, 7.57 and 7.26 (Ar), 3.04 (s, 3H, N(CH<sub>3</sub>)<sub>2</sub>), 2.68 (s, 3H, N(CH<sub>3</sub>)<sub>2</sub>), 2.47 (br, CH<sub>2</sub>CH(CH<sub>3</sub>)<sub>2</sub>), 1.86 (m, CH<sub>2</sub>CH(CH<sub>3</sub>)<sub>2</sub>), 0.81 (d, J = 6.6 Hz, CH<sub>2</sub>CH(CH<sub>3</sub>)<sub>2</sub>); <sup>13</sup>C{<sup>1</sup>H} NMR (100 MHz, CDCl<sub>3</sub>) δ 170.9 (CO), 135.4, 135.0, 132.9, 131.1, 128.4, 127.3, 127.0, 126.3, 125.5 and 125.2 (Ar), 42.3 (CH<sub>2</sub>CH(CH<sub>3</sub>)<sub>2</sub>), 38.5 (N(CH<sub>3</sub>)<sub>2</sub>), 34.3 (N(CH<sub>3</sub>)<sub>2</sub>), 28.8 (CH<sub>2</sub>), 22.4 (CH<sub>3</sub>); GC-MS  $m/z$  = 257 (M<sup>+</sup>); Anal. Calcd for C<sub>17</sub>H<sub>21</sub>NO: C, 79.96; H, 8.29. Found: C, 79.41; H, 8.11.

For **3p**: <sup>1</sup>H NMR (400 MHz, CDCl<sub>3</sub>) δ 7.62, 7.54 and 7.25 (Ar), 2.99 (s, 3H, N(CH<sub>3</sub>)<sub>2</sub>), 2.66 (s, 3H, N(CH<sub>3</sub>)<sub>2</sub>), 2.57 (br, CH<sub>2</sub>), 1.5-1.3 (br, CH<sub>2</sub>), 0.84 (s, C(CH<sub>3</sub>)<sub>3</sub>); <sup>13</sup>C{<sup>1</sup>H} NMR (100 MHz, CDCl<sub>3</sub>) δ 171.0 (CO), 137.2, 135.2, 133.4, 131.1, 127.7, 127.5, 127.1, 126.4, 125.6 and 125.2 (Ar), 45.6 (CH<sub>2</sub>CH<sub>2</sub>C(CH<sub>3</sub>)<sub>3</sub>), 38.7 (N(CH<sub>3</sub>)<sub>2</sub>), 34.4 (N(CH<sub>3</sub>)<sub>2</sub>), 29.1 (CH<sub>2</sub>CH<sub>2</sub>C(CH<sub>3</sub>)<sub>3</sub>), 28.3 (CH<sub>2</sub>CH<sub>2</sub>C(CH<sub>3</sub>)<sub>3</sub>), 28.4 (CH<sub>2</sub>CH<sub>2</sub>C(CH<sub>3</sub>)<sub>3</sub>); GC-MS  $m/z$  = 283 (M<sup>+</sup>); Anal. Calcd for C<sub>19</sub>H<sub>25</sub>NO: C, 80.52; H, 8.89. Found: C, 79.92; H, 8.63.

For **3q**: <sup>1</sup>H NMR (400 MHz, CDCl<sub>3</sub>) δ 7.69, 7.53 and 7.36 (Ar), 3.09 (s, 3H, N(CH<sub>3</sub>)<sub>2</sub>), 3.05 (m, ArCH), 2.77 (s, 3H, N(CH<sub>3</sub>)<sub>2</sub>), 2.2-1.6 (br, 8H, CH<sub>2</sub>); <sup>13</sup>C{<sup>1</sup>H} NMR (100 MHz, CDCl<sub>3</sub>) δ 171.8 (CO), 140.9, 135.7, 133.7, 131.5, 127.7, 127.6, 126.6, 125.9, 125.1 and 125.0 (Ar), 42.5

(ArCH), 39.3 (N(CH<sub>3</sub>)<sub>2</sub>), 34.9 (CH<sub>2</sub>), 34.8 (N(CH<sub>3</sub>)<sub>2</sub>), 34.7 (CH<sub>2</sub>), 25.7 (CH<sub>3</sub>); GC-MS *m/z* = 267 (M<sup>+</sup>); Anal. Calcd for C<sub>18</sub>H<sub>21</sub>NO: C, 80.86; H, 7.92. Found: C, 79.90; H, 7.90.

For **3r**: <sup>1</sup>H NMR (400 MHz, CDCl<sub>3</sub>) δ 7.37, 7.18 and 7.01 (Ar), 6.22 (t, *J* = 5.6 Hz, NH), 4.52 (d, *J* = 6.0 Hz, NHCH<sub>2</sub>Ar), 2.44 (d, *J* = 7.8 Hz, CH<sub>2</sub>CH(CH<sub>3</sub>)<sub>2</sub>), 1.89 (m, CH<sub>2</sub>CH(CH<sub>3</sub>)<sub>2</sub>), 0.84 (d, *J* = 6.4 Hz, CH<sub>2</sub>CH(CH<sub>3</sub>)<sub>2</sub>); <sup>13</sup>C{<sup>1</sup>H} NMR (100 MHz, CDCl<sub>3</sub>) δ 169.9 (CO), 138.3, 138.0, 137.8, 128.7, 128.5, 128.1, 127.6 and 127.3 (Ar), 43.8 (CH<sub>2</sub>Ar), 42.4 (CH<sub>2</sub>CHCH<sub>2</sub>), 29.7 (CH<sub>2</sub>), 22.6 (CH<sub>3</sub>); GC-MS *m/z* = 267 (M<sup>+</sup>); Anal. Calcd for C<sub>18</sub>H<sub>21</sub>NO: C, 80.86; H, 7.92. Found: C, 80.72; H, 8.08.

For **3s**: <sup>1</sup>H NMR (400 MHz, CDCl<sub>3</sub>) δ 7.28, 7.19 and 7.12 (Ar), 6.33 (t, *J* = 4.9 Hz, NH), 4.54 (d, *J* = 5.9 Hz, NHCH<sub>2</sub>Ar), 2.71 (m, CH<sub>2</sub>CH<sub>2</sub>C(CH<sub>3</sub>)<sub>3</sub>), 1.42 (m, CH<sub>2</sub>CH<sub>2</sub>C(CH<sub>3</sub>)<sub>3</sub>), 0.94 (s, CH<sub>2</sub>CH<sub>2</sub>C(CH<sub>3</sub>)<sub>3</sub>); <sup>13</sup>C{<sup>1</sup>H} NMR (100 MHz, CDCl<sub>3</sub>) δ 170.1 (CO), 141.7, 138.4, 136.4, 130.2, 129.9, 128.8, 128.0, 127.6, 126.9 and 125.7 (Ar), 46.6 (CH<sub>2</sub>CH<sub>2</sub>C(CH<sub>3</sub>)<sub>3</sub>), 43.9 (CH<sub>2</sub>Ar), 30.7 (CH<sub>2</sub>CH<sub>2</sub>C(CH<sub>3</sub>)<sub>3</sub>), 29.3 (CH<sub>2</sub>CH<sub>2</sub>C(CH<sub>3</sub>)<sub>3</sub>), 28.7 (CH<sub>2</sub>CH<sub>2</sub>C(CH<sub>3</sub>)<sub>3</sub>); GC-MS *m/z* = 295 (M<sup>+</sup>); Anal. Calcd for C<sub>20</sub>H<sub>25</sub>NO: C, 81.31; H, 8.53. Found: C, 81.09; H, 8.26.

For **3t**: <sup>1</sup>H NMR (400 MHz, CDCl<sub>3</sub>) δ 7.58, 7.32 and 7.19 (Ar), 2.74 (d, *J* = 7.1 Hz, 2H, ArCH<sub>2</sub>), 2.53 (s, 3H, C(O)CH<sub>3</sub>), 1.80 (m, 1H, CH(CH<sub>3</sub>)<sub>2</sub>), 0.86 (d, *J* = 6.6 Hz, 6H, CH(CH<sub>3</sub>)<sub>2</sub>); <sup>13</sup>C{<sup>1</sup>H} NMR (100 MHz, CDCl<sub>3</sub>) δ 202.4 (CO), 141.5, 138.4, 132.1, 131.0, 129.0 and 125.8 (Ar), 42.8 (ArCH<sub>2</sub>), 30.3 (CH(CH<sub>3</sub>)<sub>2</sub>), 30.1 (C(O)CH<sub>3</sub>), 22.6 (CH(CH<sub>3</sub>)<sub>2</sub>); GC-MS *m/z* = 176 (M<sup>+</sup>); The <sup>1</sup>H and <sup>13</sup>C NMR spectral data are in good agreement with the literature data.<sup>1</sup>

For **3u**: <sup>1</sup>H NMR (400 MHz, CDCl<sub>3</sub>) δ 7.60, 7.08 and 7.04 (Ar), 2.78 (d, *J* = 7.0 Hz, 2H, ArCH<sub>2</sub>), 2.57 (s, 3H, C(O)CH<sub>3</sub>), 2.38 (s, 3H, ArCH<sub>3</sub>), 1.81 (m, 1H, CH(CH<sub>3</sub>)<sub>2</sub>), 0.92 (d, *J* = 6.6 Hz, 6H, CH(CH<sub>3</sub>)<sub>2</sub>); <sup>13</sup>C{<sup>1</sup>H} NMR (100 MHz, CDCl<sub>3</sub>) δ 202.0 (CO), 142.3, 141.7, 135.6, 133.2, 130.0 and 126.6 (Ar), 43.1 (ArCH<sub>2</sub>), 30.5 (CH(CH<sub>3</sub>)<sub>2</sub>), 30.1 (C(O)CH<sub>3</sub>), 22.8 (CH(CH<sub>3</sub>)<sub>2</sub>), 21.7

(ArCH<sub>3</sub>); GC-MS  $m/z$  = 190 (M<sup>+</sup>); The <sup>1</sup>H and <sup>13</sup>C NMR spectral data are in good agreement with the literature data.<sup>2</sup>

For **3v**: <sup>1</sup>H NMR (400 MHz, CDCl<sub>3</sub>) δ 7.94, 7.52, 7.45 and 7.35 (Ar), 2.88 (q,  $J$  = 7.3 Hz, 2H, C(O)CH<sub>2</sub>CH<sub>3</sub>), 2.69 (d,  $J$  = 7.2 Hz, 2H, ArCH<sub>2</sub>), 1.80 (m, 1H, CH<sub>2</sub>CH(CH<sub>3</sub>)<sub>2</sub>), 1.18 (t,  $J$  = 7.3 Hz, 3H, (CO)CH<sub>2</sub>CH<sub>3</sub>), 0.88 (d,  $J$  = 7.2 Hz, 6H, CH<sub>2</sub>CH(CH<sub>3</sub>)<sub>2</sub>); <sup>13</sup>C{<sup>1</sup>H} NMR (100 MHz, CDCl<sub>3</sub>) δ 206.3 (CO), 141.1, 139.3, 132.0, 130.7, 128.1 and 125.8 (Ar), 42.7 (ArCH<sub>2</sub>), 35.6 (C(O)CH<sub>2</sub>CH<sub>3</sub>), 30.4 (CH<sub>2</sub>CH(CH<sub>3</sub>)<sub>2</sub>), 28.2 (C(O)(CH<sub>2</sub>CH<sub>3</sub>), 22.7 (CH<sub>2</sub>CH(CH<sub>3</sub>)<sub>2</sub>); GC-MS  $m/z$  = 190 (M<sup>+</sup>); The <sup>1</sup>H and <sup>13</sup>C NMR spectral data are in good agreement with the literature data.<sup>3</sup>

For **3w**: <sup>1</sup>H NMR (400 MHz, CDCl<sub>3</sub>) δ 7.71, 7.58, 7.44 and 7.26 (Ar), 2.56 (d,  $J$  = 7.4 Hz, 2H, ArCH<sub>2</sub>), 1.79 (m, 1H, CH<sub>2</sub>CH(CH<sub>3</sub>)<sub>2</sub>), 0.80 (d,  $J$  = 6.6 Hz, 6H, CH<sub>2</sub>CH(CH<sub>3</sub>)<sub>2</sub>); <sup>13</sup>C{<sup>1</sup>H} NMR (100 MHz, CDCl<sub>3</sub>) δ 199.0 (CO), 140.9, 139.0, 138.1, 133.3, 131.1, 130.4, 130.1, 128.8, 128.6 and 125.4 (Ar), 42.5 (ArCH<sub>2</sub>), 30.4 (CH<sub>2</sub>CH(CH<sub>3</sub>)<sub>2</sub>), 22.7 (CH<sub>2</sub>CH(CH<sub>3</sub>)<sub>2</sub>); GC-MS  $m/z$  = 238 (M<sup>+</sup>); The <sup>1</sup>H and <sup>13</sup>C NMR spectral data are in good agreement with the literature data.<sup>4</sup>

For **4t**: <sup>1</sup>H NMR (300 MHz, CDCl<sub>3</sub>) δ 8.15, 7.06, 7.68 and 7.36 (Ar), 2.86 and 2.68 (s, 3H, ArCH<sub>3</sub>); <sup>13</sup>C{<sup>1</sup>H} NMR (100 MHz, CDCl<sub>3</sub>) δ 135.2, 134.2, 134.1, 131.1, 129.1, 128.1, 125.8, 125.5, 125.0 and 124.1 (Ar), 21.8 and 19.4 (ArCH<sub>3</sub>); GC-MS  $m/z$  = 156 (M<sup>+</sup>); The <sup>1</sup>H and <sup>13</sup>C NMR spectral data are in good agreement with the literature data.<sup>5</sup>

For **4u**: <sup>1</sup>H NMR (400 MHz, CDCl<sub>3</sub>) δ 7.95, 7.62, 7.55, 7.42 and 7.22 (Ar), 2.80, 2.66 and 2.62 (s, 3H, ArCH<sub>3</sub>); <sup>13</sup>C{<sup>1</sup>H} NMR (100 MHz, CDCl<sub>3</sub>) δ 135.2, 134.3, 134.0, 129.3, 128.3, 127.2, 127.1, 124.9 and 124.0 (Ar), 21.8, 21.7 and 19.4 (ArCH<sub>3</sub>); GC-MS  $m/z$  = 170 (M<sup>+</sup>); The <sup>1</sup>H and <sup>13</sup>C NMR spectral data are in good agreement with the literature data.<sup>6</sup>



For **4v**:  $^1\text{H}$  NMR (400 MHz,  $\text{CDCl}_3$ )  $\delta$  8.09, 7.85, 7.57, 7.53 and 7.28 (Ar), 3.17 (q,  $J = 7.5$  Hz, 2H,  $\text{CH}_2\text{CH}_3$ ), 2.58 (s, 3H,  $\text{ArCH}_3$ ), 1.47 (t,  $J = 7.5$  Hz, 3H,  $\text{CH}_2\text{CH}_3$ );  $^{13}\text{C}\{^1\text{H}\}$  NMR (100 MHz,  $\text{CDCl}_3$ )  $\delta$  140.2, 135.3, 134.3, 130.2, 128.3, 127.4, 125.7, 125.5, 125.0 and 123.7 (Ar), 26.0 ( $\text{CH}_2\text{CH}_3$ ), 21.9 ( $\text{ArCH}_3$ ), 15.3 ( $\text{CH}_2\text{CH}_3$ ); GC-MS  $m/z = 170$  ( $\text{M}^+$ ); The  $^1\text{H}$  and  $^{13}\text{C}$  NMR spectral data are in good agreement with the literature data.<sup>7</sup>

For **4w**:  $^1\text{H}$  NMR (400 MHz,  $\text{CDCl}_3$ )  $\delta$  7.99, 7.92, 7.74, 7.64-7.44 and 7.41 (Ar), 2.65 (s, 3H,  $\text{ArCH}_3$ );  $^{13}\text{C}\{^1\text{H}\}$  NMR (100 MHz,  $\text{CDCl}_3$ )  $\delta$  141.0, 140.3, 135.1, 134.3, 130.2, 130.1, 129.4, 128.4, 127.8, 127.4, 126.8, 126.0 and 125.3 (Ar), 21.8 ( $\text{ArCH}_3$ ); GC-MS  $m/z = 218$  ( $\text{M}^+$ ); The  $^1\text{H}$  and  $^{13}\text{C}$  NMR spectral data are in good agreement with the literature data.<sup>8</sup>

## References

- (1) Kondolff, I.; Doucet, H.; Santelli, M. *Tetrahedron* **2004**, *66*, 3813.
- (2) Rao, R. A. *Indian J. Chem.* **1966**, *4*, 280.
- (3) Giordan, C.; Castaldi, G.; Uggeri, F.; Cavicchioli, S. *Eur. Pat. Appl.* **1985**, 88.
- (4) Nakamura, H.; Arata, K. *Bull. Chem. Soc. Jpn.* **2004**, *77*, 1893.
- (5) Qiu, Z. W.; Grant, D. M.; Pugmire, R. J. *J. Am. Chem. Soc.* **1982**, *104*, 2747.
- (6) Ramanampisoa, L. R.; Radke, M. *Org. Geochem.* **1995**, *23*, 803.
- (7) Audino, M.; Alexander, R.; Kagi, R. I. *Polycyclic Aromatic Compounds* **1996**, *8*, 93.
- (8) Balamurugan, R.; Gudla, V. *Org. Lett.* **2008**, *11*, 3116.

**Table S3.** Crystal data and structure refinement for **6**.

|                                   |                                                                                                                           |
|-----------------------------------|---------------------------------------------------------------------------------------------------------------------------|
| Empirical formula                 | C <sub>38</sub> H <sub>55</sub> B Cl <sub>2</sub> F <sub>4</sub> N O <sub>2</sub> P Ru                                    |
| Formula weight                    | 847.58                                                                                                                    |
| Temperature                       | 100(2) K                                                                                                                  |
| Wavelength                        | 0.7107 Å                                                                                                                  |
| Crystal system                    | Triclinic                                                                                                                 |
| Space group                       | P-1                                                                                                                       |
| Unit cell dimensions              | a = 10.23664(13) Å<br>α = 100.1596(12)°<br>b = 12.0713(2) Å<br>β = 102.3207(11)°<br>c = 16.7295(2) Å<br>γ = 103.8371(12)° |
| Volume                            | 1903.84(5) Å <sup>3</sup>                                                                                                 |
| Z                                 | 2                                                                                                                         |
| Density (calculated)              | 1.479 Mg/m <sup>3</sup>                                                                                                   |
| Absorption coefficient            | 0.649 mm <sup>-1</sup>                                                                                                    |
| F(000)                            | 880                                                                                                                       |
| Crystal size                      | 0.4281 x 0.2686 x 0.1765 mm <sup>3</sup>                                                                                  |
| Theta range for data collection   | 3.38 to 37.83°                                                                                                            |
| Index ranges                      | -17 ≤ h ≤ 17, -20 ≤ k ≤ 20, -28 ≤ l ≤ 28                                                                                  |
| Reflections collected             | 95037                                                                                                                     |
| Independent reflections           | 19744 [R(int) = 0.0279]                                                                                                   |
| Absorption correction             | Numerical                                                                                                                 |
| Max. and min. transmission        | 0.915 and 0.811                                                                                                           |
| Refinement method                 | Full-matrix least-squares on F <sup>2</sup>                                                                               |
| Data / restraints / parameters    | 19744 / 0 / 487                                                                                                           |
| Goodness-of-fit on F <sup>2</sup> | 1.004                                                                                                                     |
| Final R indices [I > 2σ(I)]       | R1 = 0.0214, wR2 = 0.0609                                                                                                 |
| R indices (all data)              | R1 = 0.0270, wR2 = 0.0625                                                                                                 |
| Largest diff. peak and hole       | 0.692 and -0.496 e.Å <sup>-3</sup>                                                                                        |

**Table S4.** Atomic Coordinates ( $\text{\AA} \times 10^4$ ) and Equivalent Isotropic Displacement Parameters ( $\text{\AA}^2 \times 10^3$ ) for **6**. Ueq is defined as 1/3 of the trace of the orthogonalized Uij tensor.

| Atom | x           | y           | z           | U(eq)     |
|------|-------------|-------------|-------------|-----------|
| Ru1  | 10291.87(5) | 721.72(5)   | 3115.42(3)  | 8.96(2)   |
| P1   | 10266.8(19) | 2396.33(16) | 4043.74(11) | 9.64(3)   |
| O1   | 13385.2(6)  | 1341.3(7)   | 3736.3(5)   | 25.22(14) |
| O2   | 8055.3(5)   | 264.3(5)    | 2707.3(3)   | 11.74(9)  |
| N1   | 6205.9(6)   | -629.3(6)   | 1578.7(4)   | 12.83(10) |
| C1   | 10625.3(7)  | 1010.4(6)   | 1048.9(5)   | 12.43(11) |
| C2   | 9784.1(7)   | 343.3(6)    | 1447.1(4)   | 10.64(10) |
| C3   | 8407.9(7)   | 485.6(6)    | 1386.3(4)   | 10.56(10) |
| C4   | 7955.4(7)   | 1249.6(6)   | 952.2(4)    | 11.94(11) |
| C5   | 8385.2(8)   | 2767.1(7)   | 144.3(5)    | 14.34(12) |
| C6   | 9262(8)     | 3428.6(7)   | -222.9(5)   | 16.22(13) |
| C7   | 10603(9)    | 3290(7)     | -188.7(5)   | 17.06(13) |
| C8   | 11060.2(8)  | 2501.9(7)   | 215.8(5)    | 15.81(13) |
| C9   | 10178(7)    | 1806.3(6)   | 604.2(5)    | 12.35(11) |
| C10  | 8821.7(7)   | 1935.1(6)   | 555.9(4)    | 11.92(11) |
| C11  | 10339.5(7)  | -454.6(6)   | 1904.2(4)   | 10.79(11) |
| C12  | 9692.2(7)   | -1210.2(6)  | 2332.8(5)   | 11.87(11) |
| C13  | 10524.8(8)  | -2031.6(7)  | 2570.4(5)   | 15.17(12) |
| C14  | 11969.8(8)  | -1478.4(7)  | 2453.1(5)   | 16.38(13) |
| C15  | 11725.5(8)  | -674(7)     | 1849(5)     | 13.48(12) |
| C16  | 7524.1(7)   | 0.5(6)      | 1917.8(4)   | 10.48(10) |
| C17  | 5557.4(8)   | -1077.7(7)  | 674.7(5)    | 18.65(14) |
| C18  | 5285.1(8)   | -915.8(8)   | 2115.8(5)   | 17.61(13) |
| C19  | 12184.8(8)  | 1105(7)     | 3491.5(5)   | 15.09(12) |

|      |             |            |            |           |
|------|-------------|------------|------------|-----------|
| C21  | 12949.5(9)  | 3768.9(7)  | 5172.3(5)  | 19.39(14) |
| C22  | 13804.6(10) | 4242.5(8)  | 6099(6)    | 23.78(17) |
| C23  | 14013.9(9)  | 3244.7(8)  | 6513(5)    | 19.91(15) |
| C24  | 12613.7(9)  | 2373.1(8)  | 6426.8(5)  | 19.85(15) |
| C25  | 11763(8)    | 1906.4(7)  | 5505.6(5)  | 15.91(13) |
| C26  | 8528.8(7)   | 2192.8(6)  | 4252.5(4)  | 11.36(11) |
| C27  | 8116.6(8)   | 1124.7(7)  | 4625.2(5)  | 14.36(12) |
| C28  | 6595.9(8)   | 875.3(7)   | 4664.4(6)  | 17.6(13)  |
| C29  | 6350.1(8)   | 1950.6(7)  | 5172.9(5)  | 16.74(13) |
| C30  | 6780.2(8)   | 3020.2(7)  | 4816.2(5)  | 16.75(13) |
| C31  | 8309.7(8)   | 3274.4(7)  | 4785.5(5)  | 15.81(13) |
| C32  | 10533.5(8)  | 3673.1(6)  | 3559.2(4)  | 12.15(11) |
| C33  | 9218.9(8)   | 3642(7)    | 2896.2(5)  | 16.47(13) |
| C34  | 9483(10)    | 4714.4(8)  | 2516.4(6)  | 20.93(15) |
| C35  | 10739.4(10) | 4834.2(7)  | 2146.9(5)  | 19.43(14) |
| C36  | 12036.9(9)  | 4830.8(8)  | 2792.3(5)  | 20.18(15) |
| C37  | 11748.3(8)  | 3738.7(7)  | 3146.7(5)  | 16.79(13) |
| CI1  | 3685.9(7)   | 5662.2(13) | 988.6(5)   | 27.52(12) |
| CI2  | 6706.7(8)   | 6231.9(17) | 1298.1(4)  | 32.99(17) |
| C38  | 5140(5)     | 5087(3)    | 1176(2)    | 25.2(4)   |
| CI1A | 3733(4)     | 5439(5)    | 1004(3)    | 27.52(12) |
| CI2A | 6610(4)     | 5909(6)    | 1279(3)    | 32.99(17) |
| C38A | 5130(3)     | 4950(2)    | 1069(14)   | 25.2(4)   |
| F1   | 5730(2)     | 2729.4(19) | 1179.3(19) | 27(3)     |
| F2   | 3993(3)     | 1131(2)    | 1173.3(14) | 31(3)     |
| F3   | 4151(4)     | 2873(2)    | 1968.5(17) | 38.7(4)   |

|     |          |          |         |         |
|-----|----------|----------|---------|---------|
| B1  | 4954(11) | 2203(9)  | 1684(6) | 21.2(6) |
| F1A | 5899(11) | 2864(8)  | 1384(6) | 27(3)   |
| F2A | 4290(9)  | 1158(11) | 1204(7) | 31(3)   |
| F3A | 4556(11) | 3067(9)  | 2120(7) | 38.7(4) |
| F4A | 5763(11) | 2159(9)  | 2419(7) | 37.1(3) |
| B1A | 5010(5)  | 2150(5)  | 1750(3) | 21.2(6) |

**Table S5.** Anisotropic Displacement Parameters ( $\text{\AA}^2 \times 10^3$ ) for **6**. The Anisotropic displacement factor exponent takes the form:  $-2\pi^2[h^2a^*2U_{11}+\dots+2hka^*b^*U_{12}]$

| Atom | U11      | U22     | U33     | U23      | U13      | U12      |
|------|----------|---------|---------|----------|----------|----------|
| Ru1  | 7.99(2)  | 9.07(2) | 9.59(2) | 2.26(2)  | 2.05(2)  | 2.26(2)  |
| P1   | 10.13(7) | 8.49(7) | 9.6(7)  | 2.38(5)  | 1.92(6)  | 1.88(5)  |
| O1   | 11.2(2)  | 31.8(3) | 26.8(3) | -1.1(3)  | 1.1(2)   | 4.8(2)   |
| O2   | 10.3(2)  | 14(2)   | 10.4(2) | 2.18(16) | 2.51(16) | 3.29(17) |
| N1   | 8.9(2)   | 14.5(3) | 13.4(2) | 3.6(2)   | 1.85(19) | 0.93(19) |
| C1   | 11.1(3)  | 13.3(3) | 14(3)   | 4(2)     | 4.8(2)   | 3.6(2)   |
| C2   | 10(3)    | 10.7(3) | 10.9(3) | 1.8(2)   | 2.8(2)   | 2.8(2)   |
| C3   | 9.1(2)   | 11.2(3) | 10.9(3) | 2.4(2)   | 2.9(2)   | 2.2(2)   |
| C4   | 10.2(3)  | 13.1(3) | 12.5(3) | 3.6(2)   | 2.8(2)   | 3(2)     |
| C5   | 14.5(3)  | 14.2(3) | 14.5(3) | 5(2)     | 3.2(2)   | 3.8(2)   |
| C6   | 18.5(3)  | 14(3)   | 15.9(3) | 6(2)     | 3.6(3)   | 3.5(2)   |
| C7   | 18.1(3)  | 16(3)   | 17.6(3) | 6.9(3)   | 6.8(3)   | 2.1(3)   |
| C8   | 14.3(3)  | 16.6(3) | 17.8(3) | 6.3(2)   | 6.8(2)   | 3(2)     |
| C9   | 12.4(3)  | 12.6(3) | 12.6(3) | 3.7(2)   | 4.5(2)   | 2.9(2)   |
| C10  | 12.5(3)  | 11.6(3) | 11.2(3) | 2.8(2)   | 2.8(2)   | 2.8(2)   |
| C11  | 10.6(3)  | 10.9(3) | 11.2(3) | 2.5(2)   | 3.3(2)   | 3.5(2)   |
| C12  | 11.7(3)  | 10.3(3) | 14(3)   | 2.7(2)   | 4.4(2)   | 3.2(2)   |
| C13  | 16.1(3)  | 13.1(3) | 19.5(3) | 6.4(2)   | 6.6(3)   | 6.5(2)   |
| C14  | 14.2(3)  | 16.9(3) | 22(3)   | 8(3)     | 6.4(3)   | 8(2)     |
| C15  | 12.3(3)  | 14.2(3) | 16.7(3) | 4.6(2)   | 6.5(2)   | 5.8(2)   |
| C16  | 9.1(2)   | 10.6(3) | 11.9(3) | 3(2)     | 2.7(2)   | 3(2)     |
| C17  | 15.3(3)  | 18.8(3) | 15.4(3) | 4.2(3)   | -2.5(3)  | -1.2(3)  |
| C18  | 10.5(3)  | 21.9(3) | 21.5(3) | 8.9(3)   | 6.1(3)   | 2.4(2)   |
| C19  | 13.5(3)  | 15.9(3) | 14.4(3) | 1.2(2)   | 3.1(2)   | 3.8(2)   |

|      |           |         |           |           |          |         |
|------|-----------|---------|-----------|-----------|----------|---------|
| C21  | 17.4(3)   | 17.4(3) | 17.1(3)   | 5.9(3)    | -1.4(3)  | -2.4(3) |
| C22  | 22(4)     | 18.7(4) | 19.9(4)   | 1.4(3)    | -4.9(3)  | -2.2(3) |
| C23  | 16(3)     | 27(4)   | 13.6(3)   | 3.7(3)    | 0.4(3)   | 4.6(3)  |
| C24  | 17.5(3)   | 27.4(4) | 14.3(3)   | 8.9(3)    | 2.1(3)   | 4.9(3)  |
| C25  | 15.1(3)   | 15.9(3) | 14.9(3)   | 6.5(2)    | 0.3(2)   | 2.3(2)  |
| C26  | 12.3(3)   | 10.1(3) | 11.7(3)   | 2.2(2)    | 4(2)     | 2.8(2)  |
| C27  | 15.8(3)   | 13.4(3) | 17.2(3)   | 6.2(2)    | 7.6(2)   | 5.4(2)  |
| C28  | 16.5(3)   | 14.4(3) | 24.3(4)   | 5.2(3)    | 10.5(3)  | 3.9(2)  |
| C29  | 15.9(3)   | 18.7(3) | 17.8(3)   | 4.2(3)    | 8.1(3)   | 6.1(3)  |
| C30  | 17.4(3)   | 15.2(3) | 20(3)     | 3.4(3)    | 7.7(3)   | 7.4(3)  |
| C31  | 16.8(3)   | 11.6(3) | 18.7(3)   | 0.6(2)    | 7.1(3)   | 3.5(2)  |
| C32  | 14.4(3)   | 9.9(3)  | 11.3(3)   | 3.4(2)    | 2.5(2)   | 2.1(2)  |
| C33  | 16.5(3)   | 15.7(3) | 16.8(3)   | 7.1(2)    | 1.2(2)   | 4.2(2)  |
| C34  | 26.9(4)   | 19.1(3) | 21.6(4)   | 11.9(3)   | 7(3)     | 10(3)   |
| C35  | 29.3(4)   | 15.7(3) | 15.1(3)   | 7.5(3)    | 6.9(3)   | 6.3(3)  |
| C36  | 23.1(4)   | 18.4(3) | 18(3)     | 8.3(3)    | 6.8(3)   | 0(3)    |
| C37  | 16.8(3)   | 18.6(3) | 17.1(3)   | 8.5(3)    | 6.5(3)   | 4.3(3)  |
| CI1  | 17.71(10) | 27.5(3) | 35.94(13) | 11.29(19) | 1.82(9)  | 5.9(16) |
| CI2  | 18.41(13) | 41.7(5) | 33.29(13) | 0.5(2)    | 8.56(11) | 3(2)    |
| C38  | 34.2(5)   | 19(10)  | 24.5(11)  | 3.8(7)    | 8(8)     | 12.3(8) |
| CI1A | 17.71(10) | 27.5(3) | 35.94(13) | 11.29(19) | 1.82(9)  | 5.9(16) |
| CI2A | 18.41(13) | 41.7(5) | 33.29(13) | 0.5(2)    | 8.56(11) | 3(2)    |
| C38A | 34.2(5)   | 19(10)  | 24.5(11)  | 3.8(7)    | 8(8)     | 12.3(8) |
| F1   | 29.3(6)   | 23.3(5) | 36.5(9)   | 11.8(6)   | 18.6(7)  | 10.2(4) |
| F2   | 20(7)     | 36.7(4) | 29.2(4)   | 7.4(3)    | 5.6(6)   | -3.8(6) |
| F3   | 37.7(10)  | 39.2(7) | 54.6(9)   | 14.4(6)   | 29.4(8)  | 21.7(7) |

|     |          |          |          |         |         |         |
|-----|----------|----------|----------|---------|---------|---------|
| B1  | 19.9(11) | 23.8(12) | 25.1(18) | 10.3(9) | 8.3(12) | 10.6(6) |
| F1A | 29.3(6)  | 23.3(5)  | 36.5(9)  | 11.8(6) | 18.6(7) | 10.2(4) |
| F2A | 20(7)    | 36.7(4)  | 29.2(4)  | 7.4(3)  | 5.6(6)  | -3.8(6) |
| F3A | 37.7(10) | 39.2(7)  | 54.6(9)  | 14.4(6) | 29.4(8) | 21.7(7) |
| F4A | 33.6(4)  | 33.8(9)  | 39.8(6)  | 13.7(6) | -4.1(4) | 10.8(5) |
| B1A | 19.9(11) | 23.8(12) | 25.1(18) | 10.3(9) | 8.3(12) | 10.6(6) |



**Table S6.** Bond Lengths for **6**.

| <b>Atom</b> | <b>Atom</b> | <b>Length/Å</b> | <b>Atom</b> | <b>Atom</b> | <b>Length/Å</b> |
|-------------|-------------|-----------------|-------------|-------------|-----------------|
| Ru1         | P1          | 2.33092(19)     | C20         | C21         | 1.5383(11)      |
| Ru1         | O2          | 2.1467(5)       | C20         | C25         | 1.5330(11)      |
| Ru1         | C11         | 2.2771(7)       | C21         | C22         | 1.5380(12)      |
| Ru1         | C12         | 2.3291(7)       | C22         | C23         | 1.5267(13)      |
| Ru1         | C19         | 1.8202(8)       | C23         | C24         | 1.5228(12)      |
| P1          | C20         | 1.8607(7)       | C24         | C25         | 1.5287(11)      |
| P1          | C26         | 1.8531(7)       | C26         | C27         | 1.5378(10)      |
| P1          | C32         | 1.8549(7)       | C26         | C31         | 1.5378(10)      |
| O1          | C19         | 1.1555(10)      | C27         | C28         | 1.5312(11)      |
| O2          | C16         | 1.2664(8)       | C28         | C29         | 1.5264(11)      |
| N1          | C16         | 1.3233(9)       | C29         | C30         | 1.5262(12)      |
| N1          | C17         | 1.4599(10)      | C30         | C31         | 1.5357(11)      |
| N1          | C18         | 1.4598(10)      | C32         | C33         | 1.5384(11)      |
| C1          | C2          | 1.3914(10)      | C32         | C37         | 1.5387(11)      |
| C1          | C9          | 1.4155(10)      | C33         | C34         | 1.5325(11)      |
| C2          | C3          | 1.4440(10)      | C34         | C35         | 1.5294(13)      |
| C2          | C11         | 1.4737(10)      | C35         | C36         | 1.5238(13)      |
| C3          | C4          | 1.3745(10)      | C36         | C37         | 1.5300(11)      |
| C3          | C16         | 1.4919(10)      | Cl1         | C38         | 1.780(4)        |
| C4          | C10         | 1.4158(10)      | Cl2         | C38         | 1.796(5)        |
| C5          | C6          | 1.3733(11)      | Cl1A        | C38A        | 1.66(3)         |
| C5          | C10         | 1.4176(11)      | Cl2A        | C38A        | 1.60(3)         |
| C6          | C7          | 1.4126(12)      | F1          | B1          | 1.407(10)       |
| C7          | C8          | 1.3737(12)      | F2          | B1          | 1.419(12)       |

|     |     |            |     |     |          |
|-----|-----|------------|-----|-----|----------|
| C9  | C10 | 1.4206(10) | F4  | B1  | 1.423(7) |
| C11 | C12 | 1.3891(10) | F1A | B1A | 1.41(5)  |
| C11 | C15 | 1.5227(10) | F2A | B1A | 1.31(6)  |
| C12 | C13 | 1.5054(10) | F3A | B1A | 1.40(5)  |
| C13 | C14 | 1.5396(11) | F4A | B1A | 1.21(4)  |
| C14 | C15 | 1.5430(11) |     |     |          |

**Table S7.** Bond Angles for **6**.

| Atom | Atom | Atom | Angle/°    | Atom | Atom | Atom | Angle/°   |
|------|------|------|------------|------|------|------|-----------|
| O1   | C19  | Ru1  | 179.29(8)  | C19  | Ru1  | C11  | 90.42(3)  |
| O2   | Ru1  | P1   | 88.448(15) | C19  | Ru1  | C12  | 103.01(3) |
| O2   | Ru1  | C11  | 90.78(2)   | C20  | P1   | Ru1  | 119.81(2) |
| O2   | Ru1  | C12  | 77.39(2)   | C21  | C20  | P1   | 116.23(5) |
| O2   | C16  | N1   | 121.21(6)  | C22  | C21  | C20  | 110.36(7) |
| O2   | C16  | C3   | 117.74(6)  | C23  | C22  | C21  | 111.34(7) |
| N1   | C16  | C3   | 120.94(6)  | C23  | C24  | C25  | 111.48(7) |
| C1   | C2   | C3   | 117.19(6)  | C24  | C23  | C22  | 110.59(7) |
| C1   | C2   | C11  | 118.80(6)  | C24  | C25  | C20  | 110.85(7) |
| C1   | C9   | C8   | 121.82(7)  | C25  | C20  | P1   | 112.79(5) |
| C1   | C9   | C10  | 119.40(6)  | C25  | C20  | C21  | 109.17(6) |
| C2   | C1   | C9   | 122.41(7)  | C26  | P1   | Ru1  | 110.10(2) |
| C2   | C3   | C16  | 121.75(6)  | C26  | P1   | C20  | 104.56(3) |
| C2   | C11  | Ru1  | 87.69(4)   | C26  | P1   | C32  | 105.76(3) |
| C2   | C11  | C15  | 120.94(6)  | C27  | C26  | P1   | 112.41(5) |
| C3   | C2   | C11  | 124.01(6)  | C28  | C27  | C26  | 110.81(6) |
| C3   | C4   | C10  | 121.46(7)  | C29  | C28  | C27  | 111.01(7) |
| C4   | C3   | C2   | 121.09(6)  | C29  | C30  | C31  | 111.23(7) |
| C4   | C3   | C16  | 116.16(6)  | C30  | C29  | C28  | 110.85(6) |
| C4   | C10  | C5   | 121.61(7)  | C30  | C31  | C26  | 109.94(6) |
| C4   | C10  | C9   | 118.46(7)  | C31  | C26  | P1   | 115.91(5) |
| C5   | C6   | C7   | 120.34(7)  | C31  | C26  | C27  | 109.80(6) |
| C5   | C10  | C9   | 119.89(7)  | C32  | P1   | Ru1  | 110.29(2) |
| C6   | C5   | C10  | 119.98(7)  | C32  | P1   | C20  | 105.32(3) |

|     |     |     |             |      |      |      |           |
|-----|-----|-----|-------------|------|------|------|-----------|
| C8  | C7  | C6  | 120.92(7)   | C33  | C32  | C37  | 108.91(6) |
| C10 | C9  | C8  | 118.78(7)   | C34  | C33  | C32  | 110.93(7) |
| C11 | Ru1 | P1  | 159.351(19) | C35  | C34  | C33  | 112.25(7) |
| C11 | Ru1 | C12 | 35.08(2)    | C35  | C36  | C37  | 110.68(7) |
| C11 | C12 | Ru1 | 70.41(4)    | C36  | C35  | C34  | 111.29(7) |
| C11 | C12 | C13 | 111.56(6)   | C36  | C37  | C32  | 111.24(7) |
| C11 | C15 | C14 | 104.66(6)   | C37  | C32  | P1   | 110.76(5) |
| C12 | Ru1 | P1  | 161.466(19) | Cl1  | C38  | Cl2  | 109.0(2)  |
| C12 | C11 | Ru1 | 74.50(4)    | Cl2A | C38A | Cl1A | 117.5(14) |
| C12 | C11 | C2  | 128.97(6)   | F1   | B1   | F2   | 108.0(7)  |
| C12 | C11 | C15 | 109.57(6)   | F1   | B1   | F4   | 110.0(7)  |
| C12 | C13 | C14 | 104.09(6)   | F2   | B1   | F4   | 106.3(6)  |
| C13 | C12 | Ru1 | 121.33(5)   | F3   | B1   | F1   | 112.1(6)  |
| C13 | C14 | C15 | 105.49(6)   | F3   | B1   | F2   | 105.6(7)  |
| C15 | C11 | Ru1 | 117.74(5)   | F3   | B1   | F4   | 114.3(7)  |
| C16 | O2  | Ru1 | 115.84(4)   | F2A  | B1A  | F1A  | 110(4)    |
| C16 | N1  | C17 | 124.61(6)   | F2A  | B1A  | F3A  | 130(4)    |
| C16 | N1  | C18 | 120.23(6)   | F3A  | B1A  | F1A  | 94(3)     |
| C18 | N1  | C17 | 115.17(6)   | F4A  | B1A  | F1A  | 104(4)    |
| C19 | Ru1 | P1  | 90.82(2)    | F4A  | B1A  | F2A  | 121(3)    |
| C19 | Ru1 | O2  | 178.35(3)   | F4A  | B1A  | F3A  | 92(4)     |

**Table S8.** Torsion Angles for **6**.

| <b>A</b> | <b>B</b> | <b>C</b> | <b>D</b> | <b>Angle(°)</b> |
|----------|----------|----------|----------|-----------------|
| Ru1      | P1       | C20      | C21      | 88.41(6)        |
| Ru1      | P1       | C20      | C25      | -38.75(6)       |
| Ru1      | P1       | C26      | C27      | 58.49(5)        |
| Ru1      | P1       | C26      | C31      | -174.09(5)      |
| Ru1      | P1       | C32      | C33      | 76.06(6)        |
| Ru1      | P1       | C32      | C37      | -46.22(5)       |
| Ru1      | O2       | C16      | N1       | 158.89(5)       |
| Ru1      | O2       | C16      | C3       | -24.80(8)       |
| Ru1      | C11      | C12      | C13      | -116.93(6)      |
| Ru1      | C11      | C15      | C14      | 71.18(7)        |
| Ru1      | C12      | C13      | C14      | -64.52(7)       |
| P1       | Ru1      | O2       | C16      | 130.47(5)       |
| P1       | Ru1      | C11      | C2       | -22.50(8)       |
| P1       | Ru1      | C11      | C12      | -154.14(4)      |
| P1       | Ru1      | C11      | C15      | 101.57(6)       |
| P1       | Ru1      | C12      | C11      | 151.06(5)       |
| P1       | Ru1      | C12      | C13      | -105.05(7)      |
| P1       | Ru1      | C19      | O1       | 93(8)           |
| P1       | C20      | C21      | C22      | 172.90(6)       |
| P1       | C20      | C25      | C24      | -170.88(5)      |
| P1       | C26      | C27      | C28      | -171.45(5)      |
| P1       | C26      | C31      | C30      | 173.25(5)       |
| P1       | C32      | C33      | C34      | 179.69(5)       |
| P1       | C32      | C37      | C36      | -176.50(5)      |

|    |     |     |     |            |
|----|-----|-----|-----|------------|
| O2 | Ru1 | P1  | C26 | 21.27(3)   |
| O2 | Ru1 | P1  | C32 | -95.06(3)  |
| O2 | Ru1 | C11 | C2  | 65.16(4)   |
| O2 | Ru1 | C11 | C12 | -66.47(4)  |
| O2 | Ru1 | C11 | C15 | -170.77(5) |
| O2 | Ru1 | C12 | C11 | 110.04(4)  |
| O2 | Ru1 | C12 | C13 | -146.06(6) |
| O2 | Ru1 | C19 | O1  | 29(8)      |
| C1 | C2  | C3  | C4  | 0.01(10)   |
| C1 | C2  | C3  | C16 | -168.04(6) |
| C1 | C2  | C11 | Ru1 | 113.21(6)  |
| C1 | C2  | C11 | C12 | -178.92(7) |
| C1 | C2  | C11 | C15 | -8.05(10)  |
| C1 | C9  | C10 | C4  | -0.50(10)  |
| C1 | C9  | C10 | C5  | 177.21(7)  |
| C2 | C1  | C9  | C8  | 178.59(7)  |
| C2 | C1  | C9  | C10 | -0.16(11)  |
| C2 | C3  | C4  | C10 | -0.68(11)  |
| C2 | C3  | C16 | O2  | 52.71(9)   |
| C2 | C3  | C16 | N1  | -130.98(7) |
| C2 | C11 | C12 | Ru1 | -73.85(7)  |
| C2 | C11 | C12 | C13 | 169.22(7)  |
| C2 | C11 | C15 | C14 | 176.37(6)  |
| C3 | C2  | C11 | Ru1 | -66.52(7)  |
| C3 | C2  | C11 | C12 | 1.35(11)   |
| C3 | C2  | C11 | C15 | 172.22(6)  |

|     |     |     |     |            |
|-----|-----|-----|-----|------------|
| C3  | C4  | C10 | C9  | 0.92(10)   |
| C4  | C3  | C16 | O2  | -115.90(7) |
| C4  | C3  | C16 | N1  | 60.42(9)   |
| C5  | C6  | C7  | C8  | -0.51(12)  |
| C6  | C5  | C10 | C4  | 179.06(7)  |
| C6  | C5  | C10 | C9  | 1.42(11)   |
| C6  | C7  | C8  | C9  | 0.34(12)   |
| C7  | C8  | C9  | C1  | -178.05(7) |
| C7  | C8  | C9  | C10 | 0.70(11)   |
| C8  | C9  | C10 | C4  | -179.28(7) |
| C8  | C9  | C10 | C5  | -1.57(11)  |
| C9  | C1  | C2  | C3  | 0.41(10)   |
| C9  | C1  | C2  | C11 | -179.34(6) |
| C10 | C5  | C6  | C7  | -0.37(12)  |
| C11 | Ru1 | P1  | C20 | -129.42(6) |
| C11 | Ru1 | P1  | C26 | 109.36(6)  |
| C11 | Ru1 | P1  | C32 | -6.97(6)   |
| C11 | Ru1 | O2  | C16 | -28.89(5)  |
| C11 | Ru1 | C12 | C13 | 103.89(7)  |
| C11 | Ru1 | C19 | O1  | -108(8)    |
| C11 | C2  | C3  | C4  | 179.74(6)  |
| C11 | C2  | C3  | C16 | 11.69(10)  |
| C11 | C12 | C13 | C14 | 15.03(8)   |
| C12 | Ru1 | P1  | C20 | 102.65(7)  |
| C12 | Ru1 | P1  | C26 | -18.56(7)  |
| C12 | Ru1 | P1  | C32 | -134.90(6) |

|     |     |     |     |            |
|-----|-----|-----|-----|------------|
| C12 | Ru1 | C11 | C2  | 131.63(6)  |
| C12 | Ru1 | C11 | C15 | -104.30(7) |
| C12 | Ru1 | C19 | O1  | -75(8)     |
| C12 | C11 | C15 | C14 | -11.15(8)  |
| C12 | C13 | C14 | C15 | -21.09(8)  |
| C13 | C14 | C15 | C11 | 19.85(8)   |
| C15 | C11 | C12 | Ru1 | 114.46(5)  |
| C15 | C11 | C12 | C13 | -2.47(8)   |
| C16 | C3  | C4  | C10 | 168.01(6)  |
| C17 | N1  | C16 | O2  | -173.05(7) |
| C17 | N1  | C16 | C3  | 10.77(11)  |
| C18 | N1  | C16 | O2  | 7.37(11)   |
| C18 | N1  | C16 | C3  | -168.81(7) |
| C19 | Ru1 | P1  | C20 | -36.03(4)  |
| C19 | Ru1 | P1  | C26 | -157.25(4) |
| C19 | Ru1 | P1  | C32 | 86.42(4)   |
| C19 | Ru1 | O2  | C16 | -165.7(10) |
| C19 | Ru1 | C11 | C2  | -115.96(4) |
| C19 | Ru1 | C11 | C12 | 112.40(5)  |
| C19 | Ru1 | C11 | C15 | 8.10(6)    |
| C19 | Ru1 | C12 | C11 | -71.60(5)  |
| C19 | Ru1 | C12 | C13 | 32.30(6)   |
| C20 | P1  | C26 | C27 | -71.46(6)  |
| C20 | P1  | C26 | C31 | 55.96(6)   |
| C20 | P1  | C32 | C33 | -153.33(5) |
| C20 | P1  | C32 | C37 | 84.39(6)   |



|     |     |     |     |            |
|-----|-----|-----|-----|------------|
| C21 | C20 | C25 | C24 | 58.30(9)   |
| C21 | C22 | C23 | C24 | -55.39(10) |
| C22 | C23 | C24 | C25 | 55.31(10)  |
| C23 | C24 | C25 | C20 | -57.47(9)  |
| C25 | C20 | C21 | C22 | -58.17(9)  |
| C26 | P1  | C20 | C21 | -147.67(6) |
| C26 | P1  | C20 | C25 | 85.17(6)   |
| C26 | P1  | C32 | C33 | -42.95(6)  |
| C26 | P1  | C32 | C37 | -165.23(5) |
| C26 | C27 | C28 | C29 | -56.80(9)  |
| C27 | C26 | C31 | C30 | -58.04(8)  |
| C27 | C28 | C29 | C30 | 55.66(9)   |
| C28 | C29 | C30 | C31 | -56.39(9)  |
| C29 | C30 | C31 | C26 | 57.71(9)   |
| C31 | C26 | C27 | C28 | 57.94(8)   |
| C32 | P1  | C20 | C21 | -36.43(7)  |
| C32 | P1  | C20 | C25 | -163.59(5) |
| C32 | P1  | C26 | C27 | 177.62(5)  |
| C32 | P1  | C26 | C31 | -54.95(6)  |
| C32 | C33 | C34 | C35 | 55.25(9)   |
| C33 | C32 | C37 | C36 | 59.04(8)   |
| C33 | C34 | C35 | C36 | -53.65(10) |
| C34 | C35 | C36 | C37 | 54.59(9)   |
| C35 | C36 | C37 | C32 | -58.26(9)  |
| C37 | C32 | C33 | C34 | -57.00(8)  |

**Table S9.** Hydrogen Atom Coordinates ( $\text{\AA} \times 10^4$ ) and Isotropic Displacement Parameters ( $\text{\AA}^2 \times 10^3$ ) for **6**.

| Atom | <i>x</i>  | <i>y</i> | <i>z</i> | U(eq) |
|------|-----------|----------|----------|-------|
| H1   | 10341(13) | 146(11)  | 3835(8)  | 27(3) |
| H1A  | 11533     | 929      | 1077     | 15    |
| H4   | 7041      | 1319     | 917      | 14    |
| H5   | 7487      | 2867     | 122      | 17    |
| H6   | 8965      | 3982     | -501     | 19    |
| H7   | 11197     | 3748     | -449     | 20    |
| H8   | 11967     | 2421     | 236      | 19    |
| H13B | 10093     | -2830    | 2198     | 18    |
| H13A | 10596     | -2079    | 3162     | 18    |
| H14A | 12355     | -2094    | 2206     | 20    |
| H14B | 12629     | -1017    | 3000     | 20    |
| H15A | 12487     | 73       | 2029     | 16    |
| H15B | 11672     | -1066    | 1266     | 16    |
| H17C | 6270      | -913     | 368      | 28    |
| H17B | 4840      | -693     | 499      | 28    |
| H17A | 5127      | -1928    | 551      | 28    |
| H18C | 5781      | -522     | 2705     | 26    |
| H18A | 4999      | -1768    | 2055     | 26    |
| H18B | 4457      | -650     | 1948     | 26    |
| H20  | 11079     | 3364     | 5475     | 16    |
| H21A | 13470     | 3356     | 4849     | 23    |
| H21B | 12804     | 4432     | 4926     | 23    |
| H22A | 14726     | 4771     | 6129     | 29    |

|      |       |      |      |    |
|------|-------|------|------|----|
| H23B | 14596 | 2835 | 6243 | 24 |
| H23A | 14511 | 3572 | 7117 | 24 |
| H24B | 12078 | 2763 | 6753 | 24 |
| H24A | 12774 | 1707 | 6665 | 24 |
| H25B | 10850 | 1362 | 5473 | 19 |
| H25A | 12264 | 1463 | 5187 | 19 |
| H26  | 7841  | 2008 | 3690 | 14 |
| H27B | 8240  | 427  | 4273 | 17 |
| H27A | 8736  | 1278 | 5199 | 17 |
| H28B | 5972  | 654  | 4085 | 21 |
| H28A | 6365  | 206  | 4927 | 21 |
| H29B | 5349  | 1784 | 5159 | 20 |
| H29A | 6897  | 2121 | 5767 | 20 |
| H30A | 6654  | 3714 | 5172 | 20 |
| H30B | 6171  | 2878 | 4241 | 20 |
| H31A | 8928  | 3471 | 5364 | 19 |
| H31B | 8555  | 3957 | 4537 | 19 |
| H32  | 10781 | 4404 | 4016 | 15 |
| H33A | 8944  | 2915 | 2443 | 20 |
| H33B | 8441  | 3630 | 3162 | 20 |
| H34B | 8642  | 4646 | 2067 | 25 |
| H34A | 9645  | 5433 | 2959 | 25 |
| H35B | 10523 | 4175 | 1648 | 23 |
| H35A | 10925 | 5576 | 1959 | 23 |
| H36B | 12326 | 5545 | 3258 | 24 |
| H36A | 12811 | 4844 | 2523 | 24 |

|      |          |          |         |       |
|------|----------|----------|---------|-------|
| H37B | 11517    | 3027     | 2686    | 20    |
| H38B | 5026     | 4427     | 697     | 30    |
| H38A | 5199     | 4787     | 1693    | 30    |
| H38C | 5160     | 4500     | 1508    | 30    |
| H38D | 4991     | 4399     | 527     | 30    |
| H12  | 8760(11) | -1412(9) | 2318(7) | 11(2) |

# The $^1\text{H}$ and $^{13}\text{C}$ NMR Spectra of Selected Organic Products

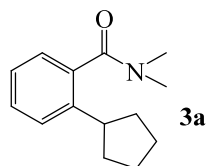

$^1\text{H}$  NMR (400 MHz,  $\text{CDCl}_3$ )

SpinWorks 2.5: Std proton

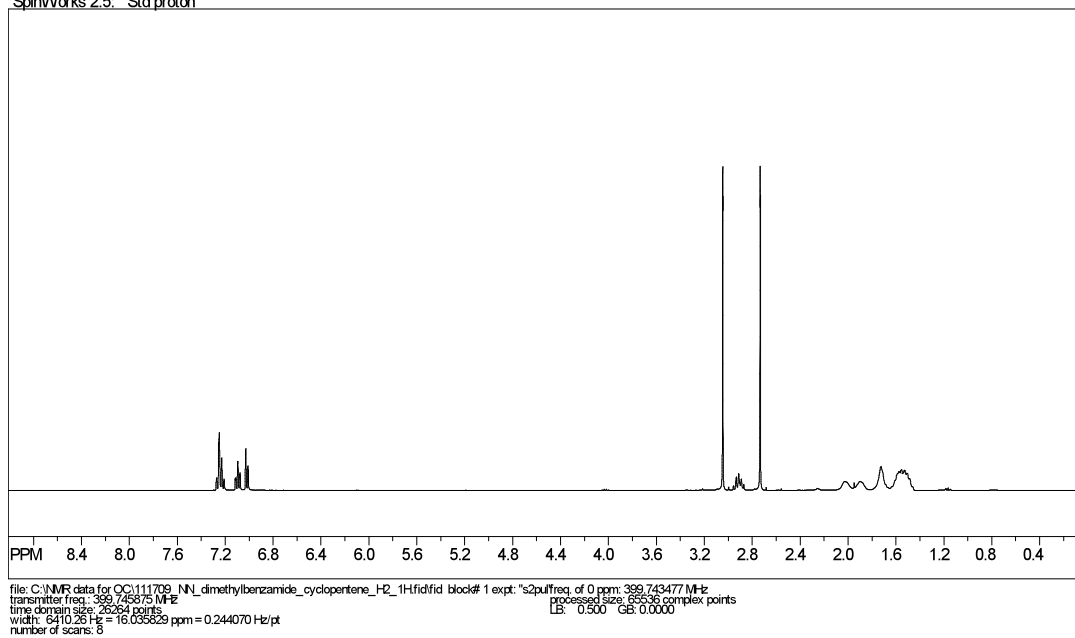

$^{13}\text{C}\{^1\text{H}\}$  NMR (100 MHz,  $\text{CDCl}_3$ )

SpinWorks 2.5: Std carbon

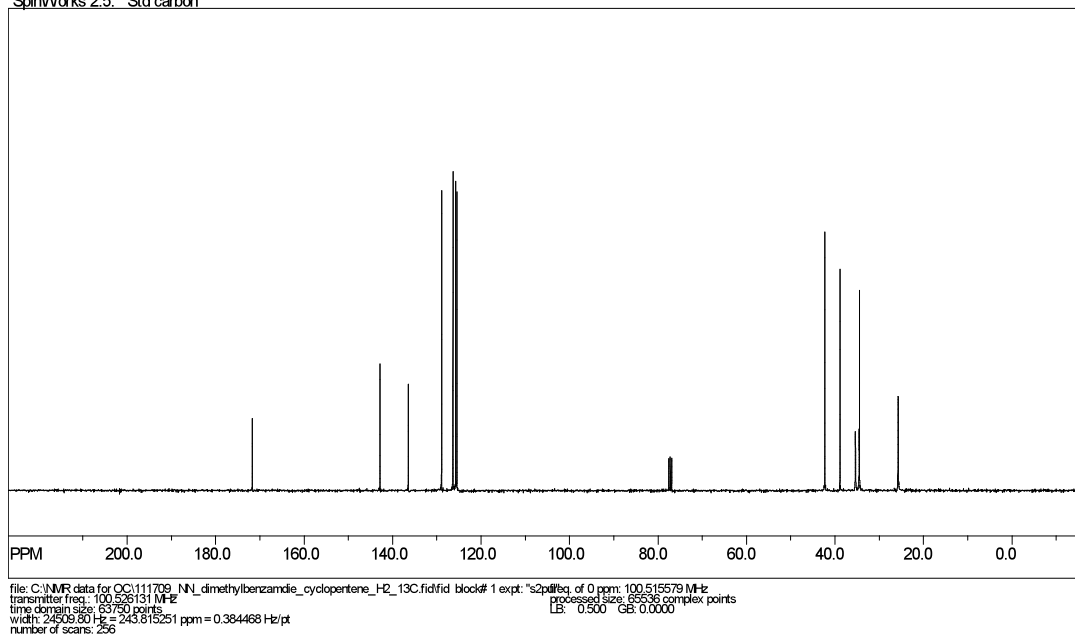



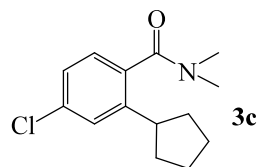

<sup>1</sup>H NMR (400 MHz, CDCl<sub>3</sub>)

SpinWorks 2.5: Std proton

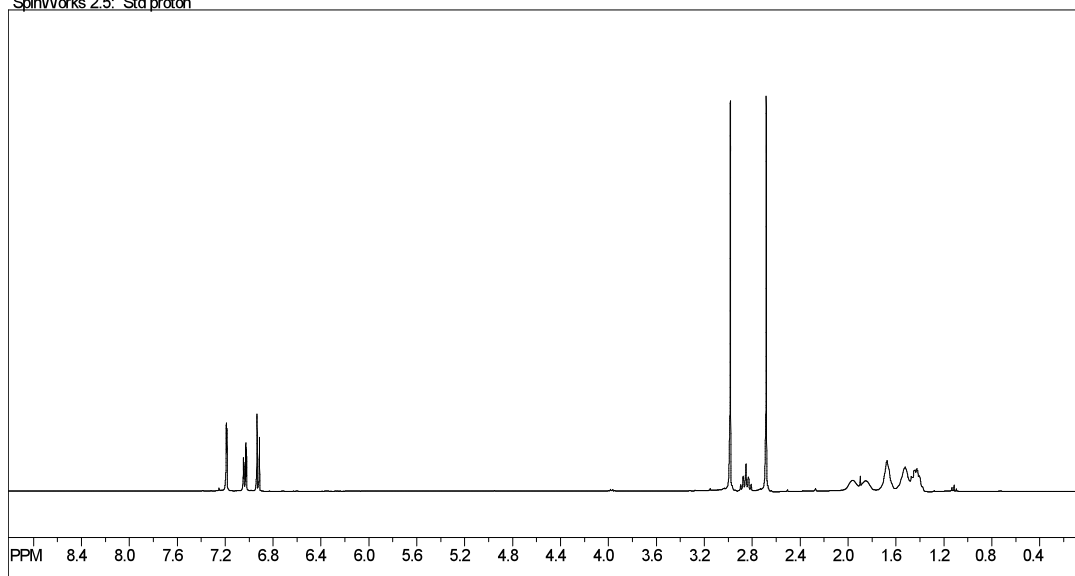

file: C:\NMR data for QC\021010\_4-chloro-N,N-dimethylbenzamide-cyclopentene\_H2\_1H.fid\fid block# 1 exp\ft2d0 ppm: 399.743477 MHz  
 transmitter freq: 399.748775 MHz  
 time domain size: 65536 points  
 width: 6410.26 Hz = 16.035829 ppm = 0.244070 Hz/pt  
 number of scans: 8  
 processed size: 65536 complex points  
 LB: 0.500 GB: 0.0000

<sup>13</sup>C{<sup>1</sup>H} NMR (100 MHz, CDCl<sub>3</sub>)

SpinWorks 2.5: Std carbon

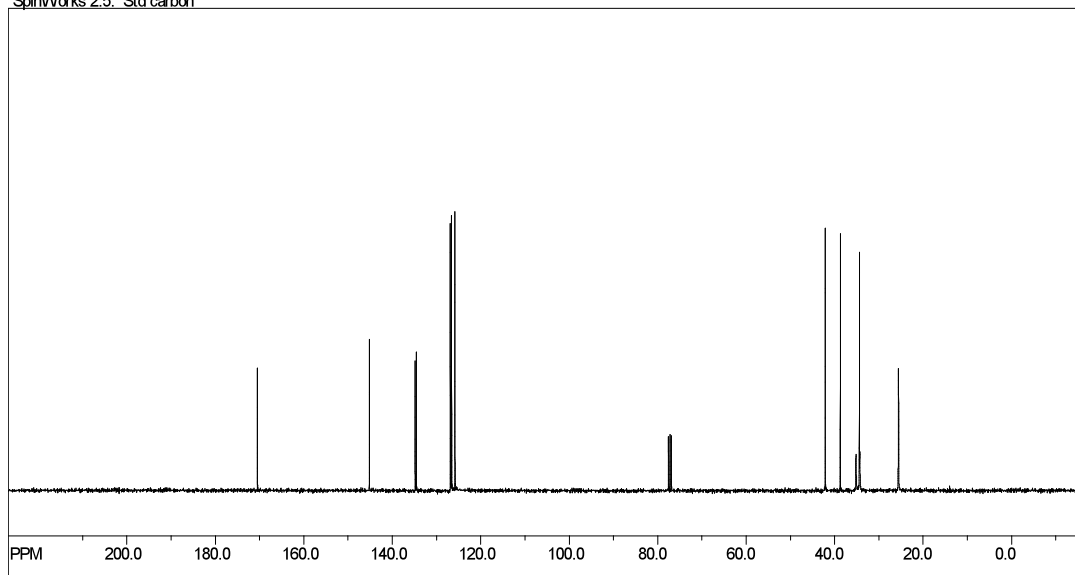

file: C:\NMR data for QC\021010\_4-chloro-N,N-dimethylbenzamide-cyclopentene\_H2\_13C.fid\fid block# 1 exp\ft2d0 ppm: 100.515583 MHz  
 transmitter freq: 100.521131 MHz  
 time domain size: 65750 points  
 width: 24509.80 Hz = 243.815251 ppm = 0.384468 Hz/pt  
 number of scans: 256  
 processed size: 65536 complex points  
 LB: 0.500 GB: 0.0000

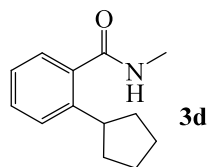

$^1\text{H}$  NMR (400 MHz,  $\text{CDCl}_3$ )

SpinWorks 2.5: Std proton

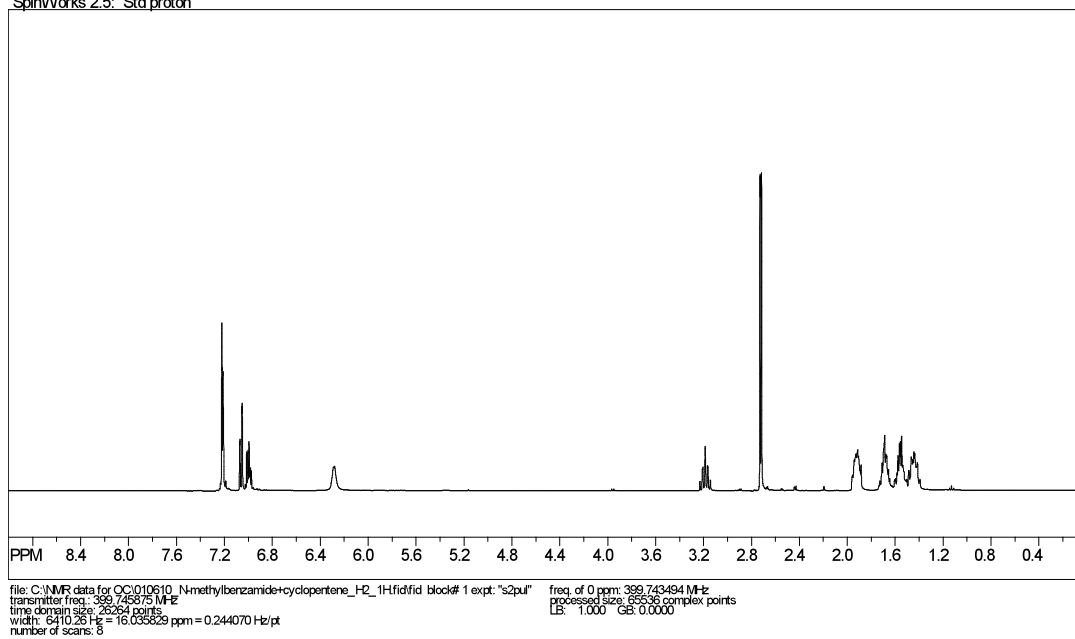

$^{13}\text{C}\{^1\text{H}\}$  NMR (100 MHz,  $\text{CDCl}_3$ )

SpinWorks 2.5: Std carbon

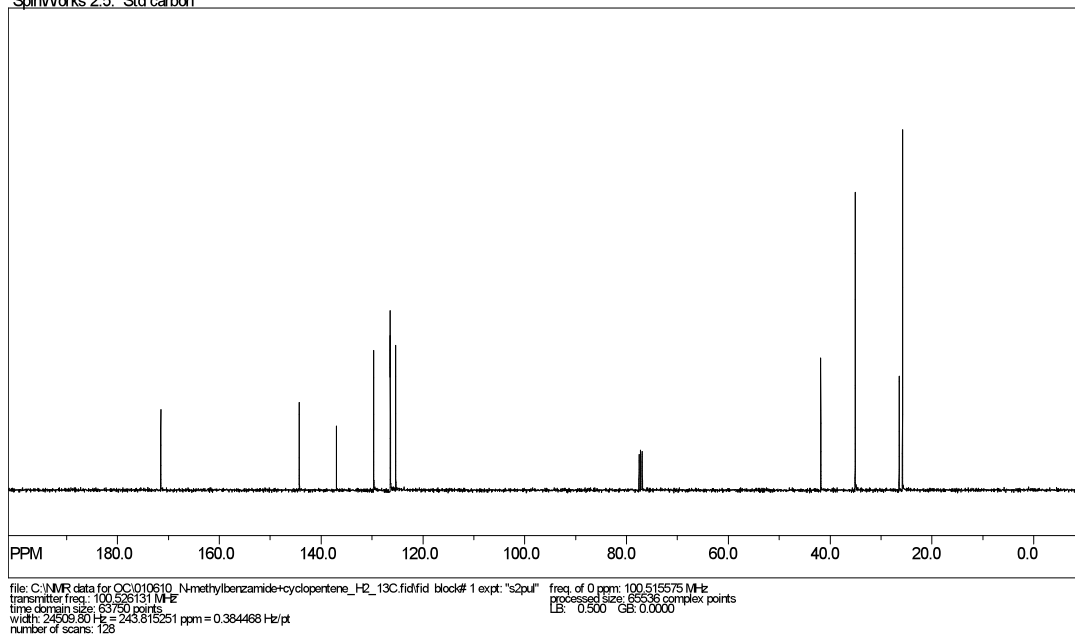



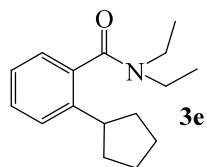

<sup>1</sup>H NMR (400 MHz, CDCl<sub>3</sub>)

SpinWorks 2.5: Std.proton

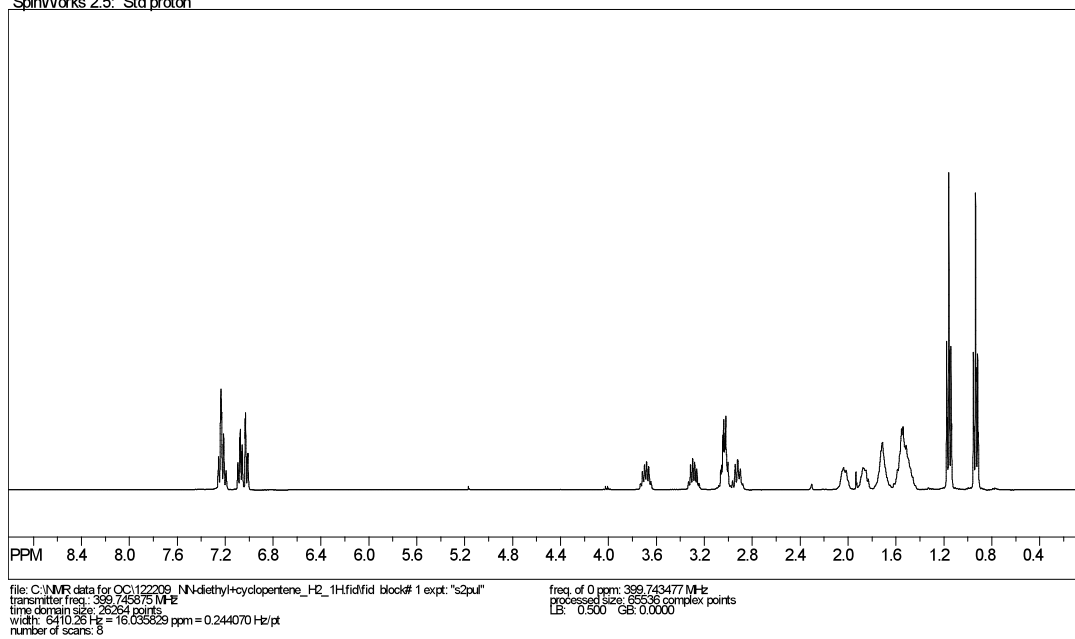

<sup>13</sup>C{<sup>1</sup>H} NMR (100 MHz, CDCl<sub>3</sub>)

SpinWorks 2.5:

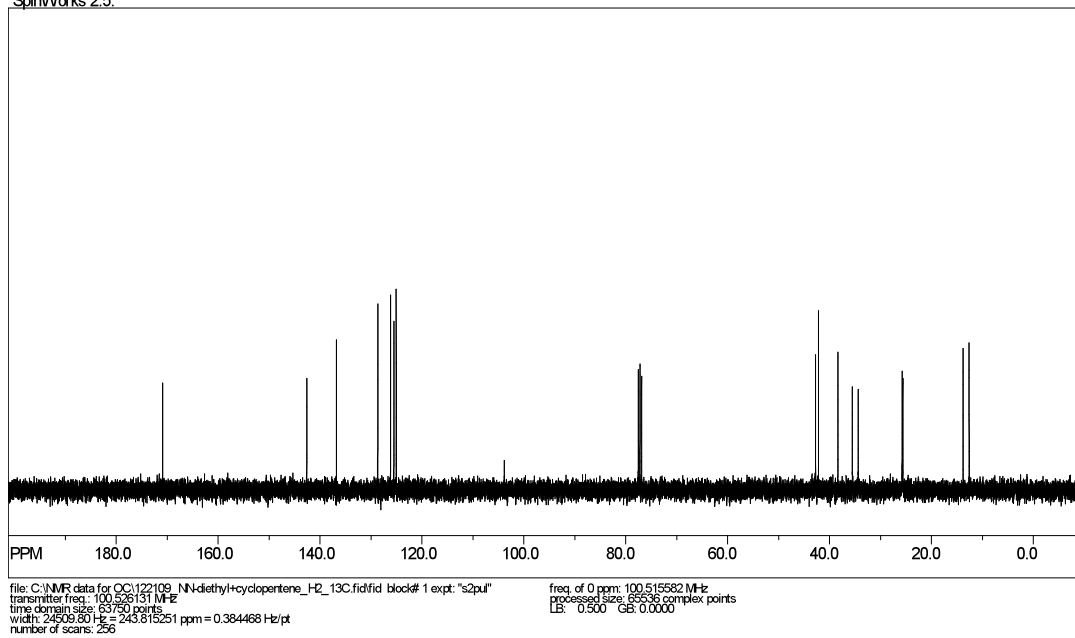

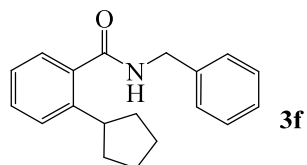

<sup>1</sup>H NMR (400 MHz, CDCl<sub>3</sub>)

SpinWorks 2.5: Std proton

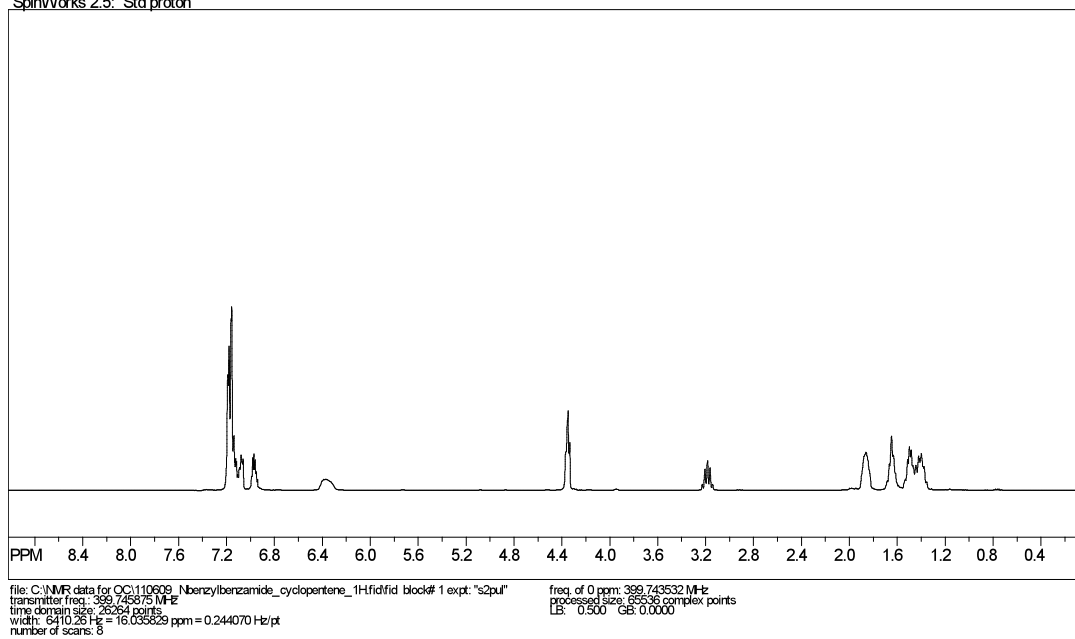

<sup>13</sup>C{<sup>1</sup>H} NMR (100 MHz, CDCl<sub>3</sub>)

SpinWorks 2.5: Std carbon

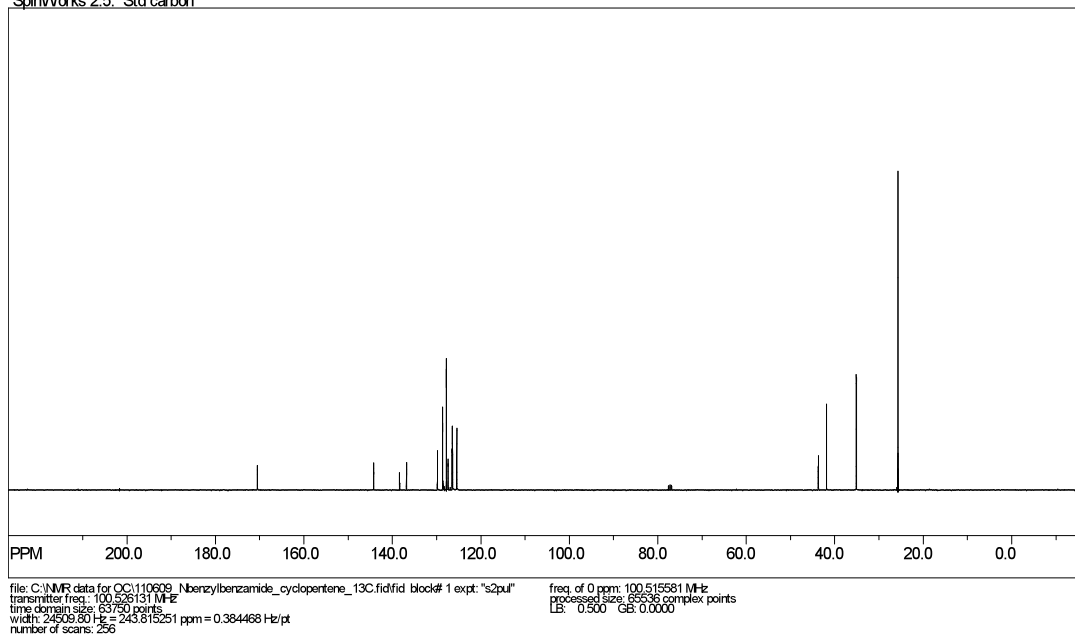

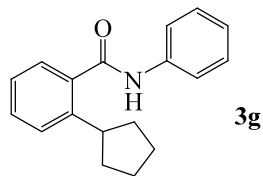

$^1\text{H}$  NMR (400 MHz,  $\text{CDCl}_3$ )

SpinWorks 2.5: Std proton

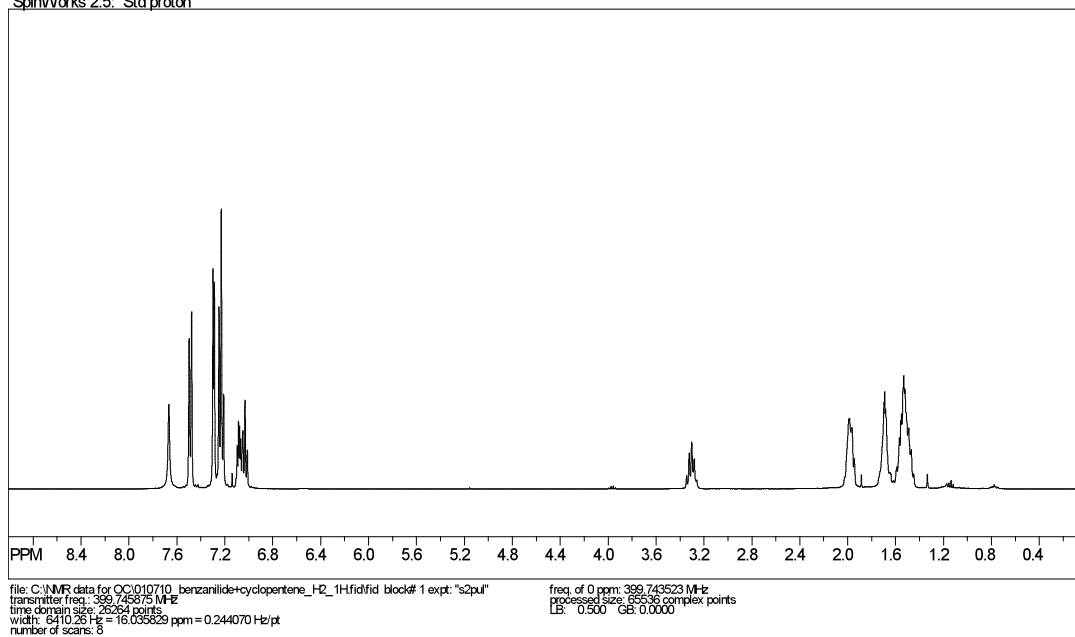

$^{13}\text{C}\{^1\text{H}\}$  NMR (100 MHz,  $\text{CDCl}_3$ )

SpinWorks 2.5: Std carbon

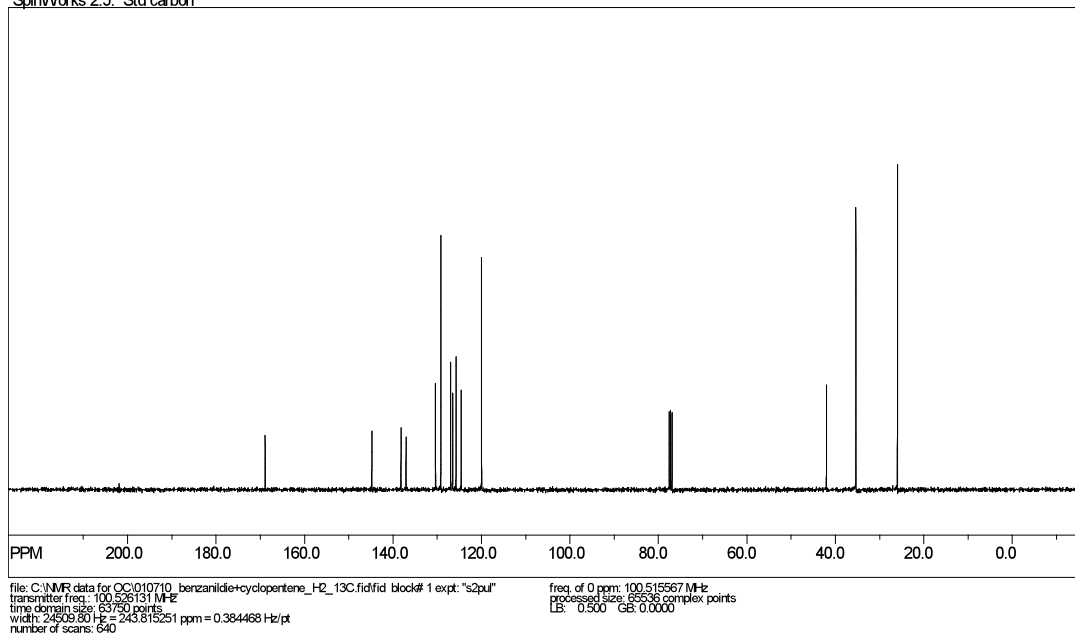

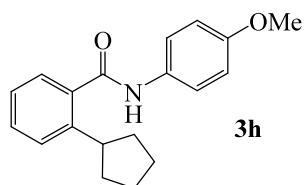

<sup>1</sup>H NMR (400 MHz, CDCl<sub>3</sub>)

SpinWorks 2.5: Std proton

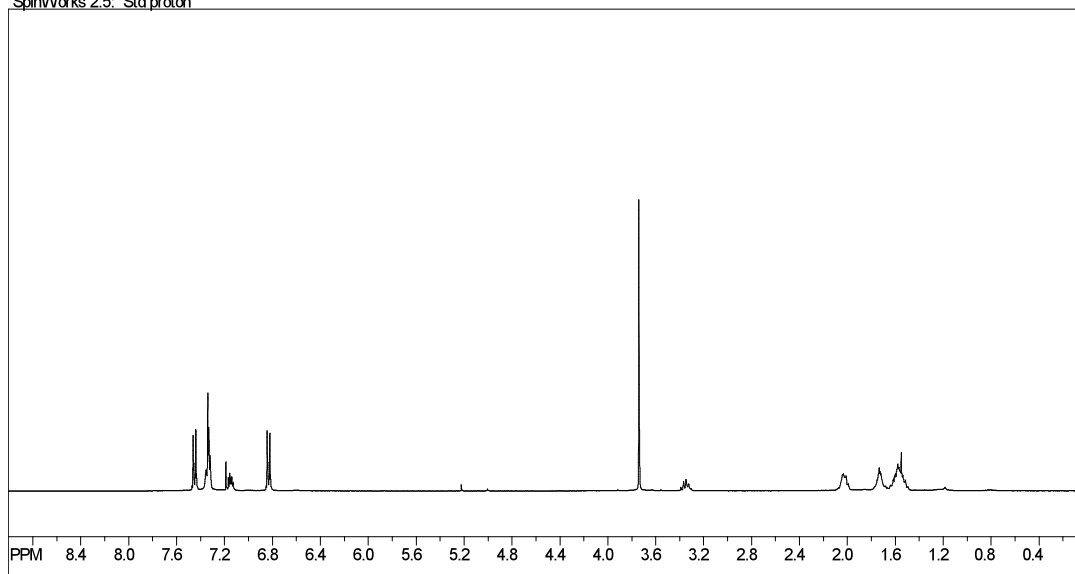

file: C:\NMR data for QC020410\_4-methoxybenzamide\_H2\_1H.fid\fid block# 1 expt: "s2pu"  
 transmitter freq: 399.745715 MHz  
 time domain size: 62-64 points  
 width: 6410.25 Hz = 16.035829 ppm = 0.244070 Hz/pt  
 number of scans: 8

freq. of 0 ppm: 399.743504 MHz  
 processed size: 65536 complex points  
 LB: 0.500 GB 0.0000

<sup>13</sup>C{<sup>1</sup>H} NMR (100 MHz, CDCl<sub>3</sub>)

SpinWorks 2.5: Std carbon

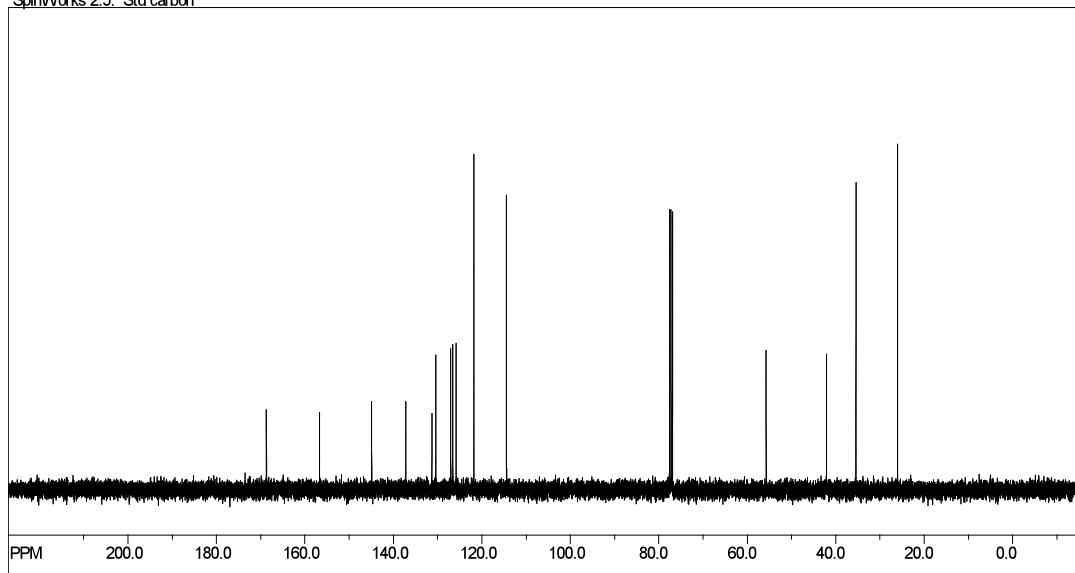

file: C:\NMR data for QC020110\_4-methoxybenzamide\_H2\_13C.fid\fid block# 1 expt: "s2pu"  
 transmitter freq: 100.625131 MHz  
 time domain size: 63160 points  
 width: 24509.80 Hz = 243.815251 ppm = 0.384468 Hz/pt  
 number of scans: 256

freq. of 0 ppm: 100.515558 MHz  
 processed size: 65536 complex points  
 LB: 0.500 GB 0.0000

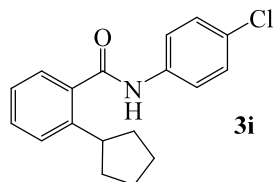

$^1\text{H}$  NMR (400 MHz,  $\text{CDCl}_3$ )

SpinWorks 2.5: Std proton

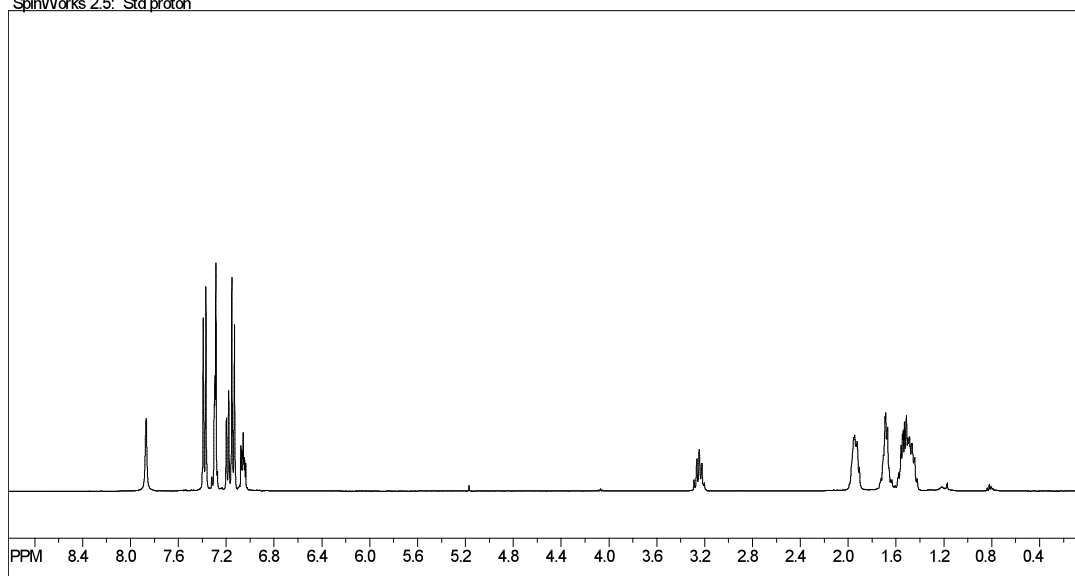

file: C:\NMR data for QC\020410\_4-chlorobenzamide\_H2\_1Hfidfid block# 1 expt: "s2pul"  
 transmitter freq: 399.743517 MHz  
 time domain size: 26264 points  
 width: 6410.26 Hz = 16.035829 ppm = 0.244070 Hz/pt  
 number of scans: 8

freq. of 0 ppm: 399.743517 MHz  
 processed size: 65536 complex points  
 LB: 0.500 GB 0.0000

$^{13}\text{C}\{^1\text{H}\}$  NMR (100 MHz,  $\text{CDCl}_3$ )

SpinWorks 2.5: Std carbon

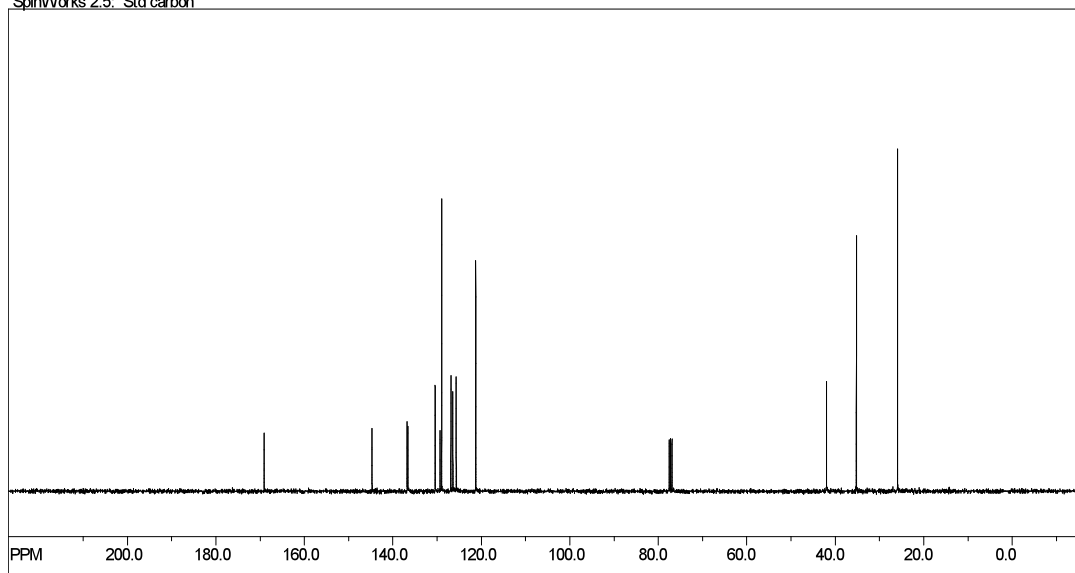

file: C:\NMR data for QC\020110\_4-chlorobenzamide\_H2\_13Cfidfid block# 1 expt: "s2pul"  
 transmitter freq: 100.626131 MHz  
 time domain size: 65150 points  
 width: 24509.80 Hz = 243.815251 ppm = 0.384468 Hz/pt  
 number of scans: 256

freq. of 0 ppm: 100.615570 MHz  
 processed size: 65536 complex points  
 LB: 0.500 GB 0.0000

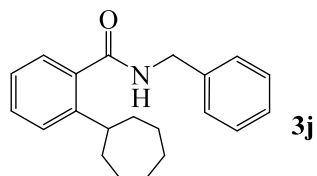

$^1\text{H}$  NMR (400 MHz,  $\text{CDCl}_3$ )

SpinWorks 2.5: Std proton

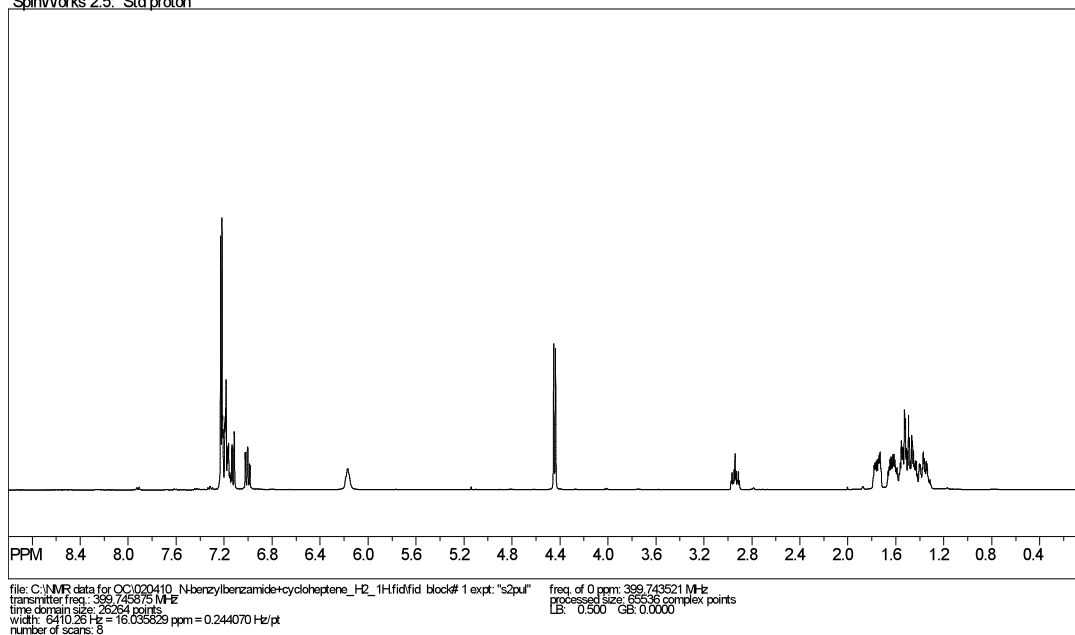

$^{13}\text{C}\{^1\text{H}\}$  NMR (100 MHz,  $\text{CDCl}_3$ )

SpinWorks 2.5: Std carbon

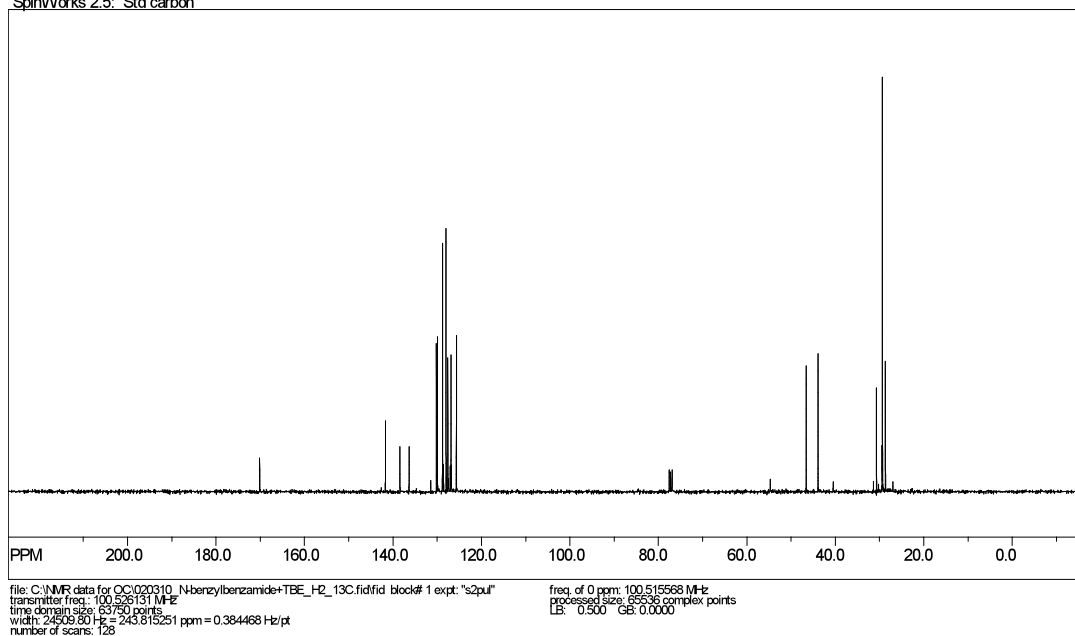

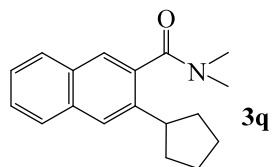

$^1\text{H}$  NMR (400 MHz,  $\text{CDCl}_3$ )

SpinWorks 2.5: Std proton

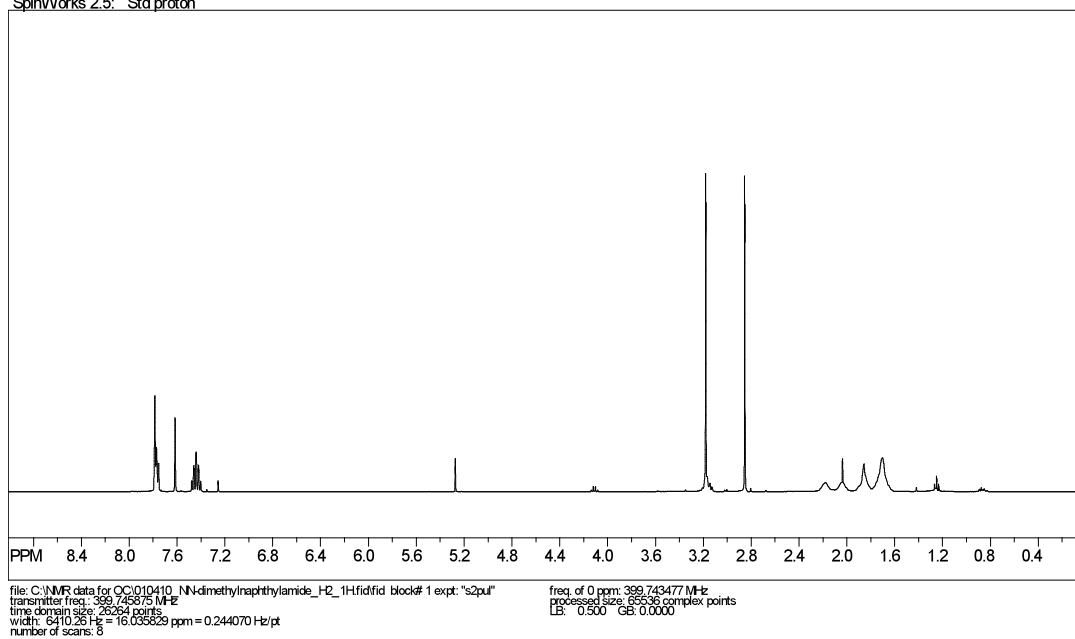

$^{13}\text{C}\{^1\text{H}\}$  NMR (100 MHz,  $\text{CDCl}_3$ )

SpinWorks 2.5: Std carbon

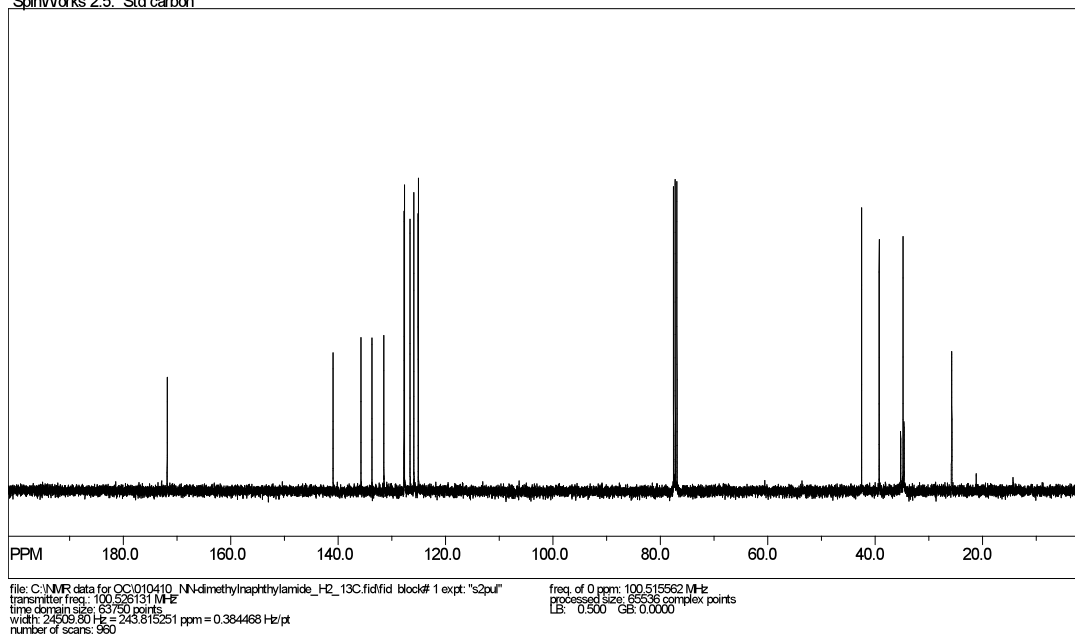

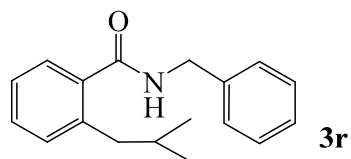

$^1\text{H}$  NMR (400 MHz,  $\text{CDCl}_3$ )

SpinWorks 2.5: Std proton

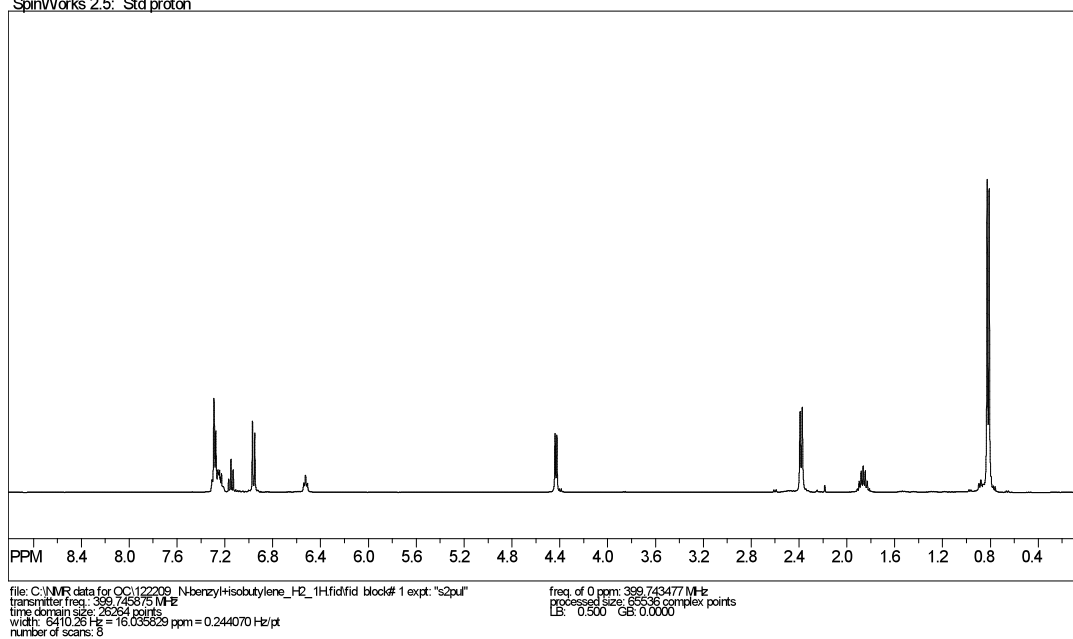

$^{13}\text{C}\{^1\text{H}\}$  NMR (100 MHz,  $\text{CDCl}_3$ )

SpinWorks 2.5: 13C OBSERVE

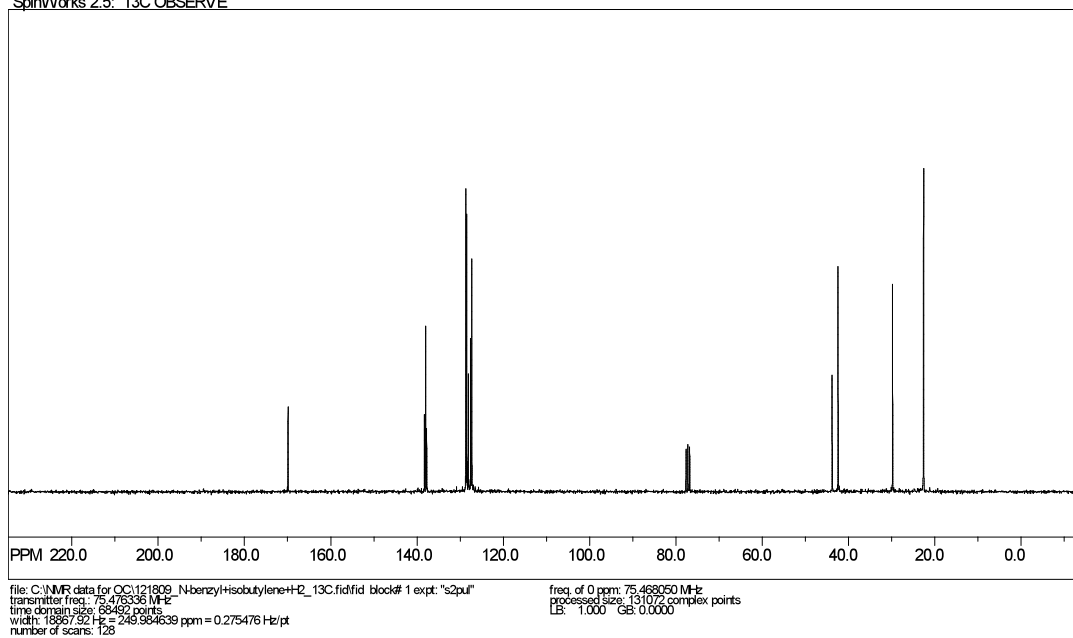



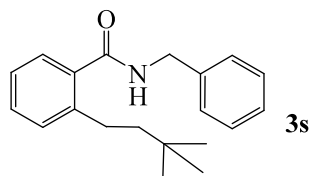

$^1\text{H}$  NMR (400 MHz,  $\text{CDCl}_3$ )

SpinWorks 2.5: Std proton

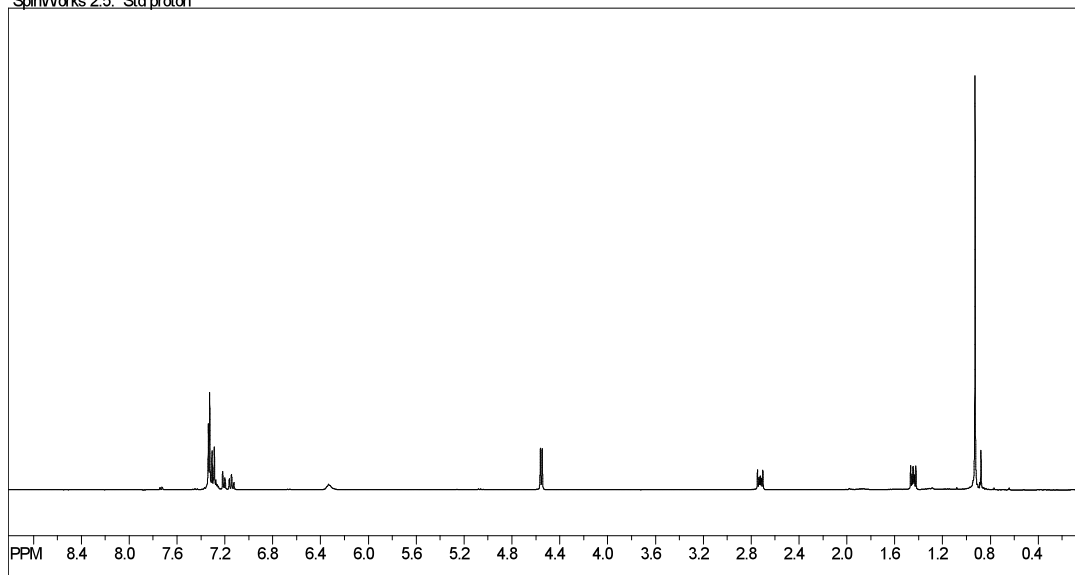

file: C:\NMR data for OC1000310\_N-benzylbenzamide+TBE\_H2\_1Hfidfid block# 1 exp: "s2pul"  
 transmitter freq: 399.743477 MHz  
 time domain size: 26264 points  
 width: 6410.23 Hz = 16.03929 ppm = 0.244070 Hz/pt  
 number of scans: 8

freq. of 0 ppm: 399.743477 MHz  
 processed size: 65536 complex points  
 LB: 0.500 GB: 0.0000

$^{13}\text{C}\{^1\text{H}\}$  NMR (100 MHz,  $\text{CDCl}_3$ )

SpinWorks 2.5: Std carbon

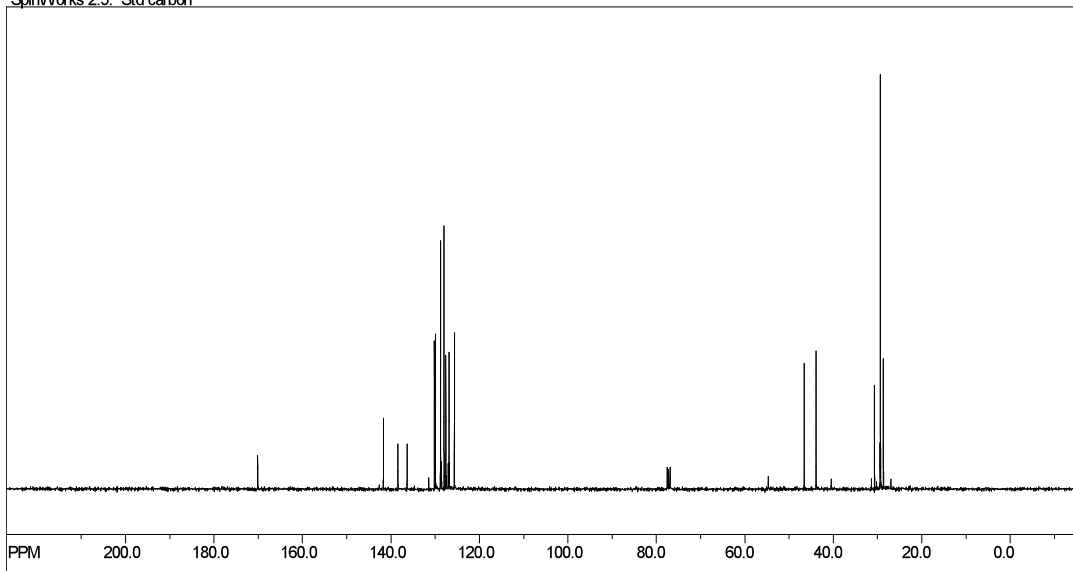

file: C:\NMR data for OC\020310\_Nbenzylbenzamide+TBE\_H2\_13C.fid\fid block# 1 expt: "s2pu"  
transmitter freq: 100.526131 MHz  
time domain size: 65750 points  
width: 24509.80 Hz = 243.815251 ppm = 0.384468 Hz/pt  
number of scans: 128

freq of 0 ppm: 100.515568 MHz  
processed size: 65536 complex points  
LB: 0.500 GB: 0.0000

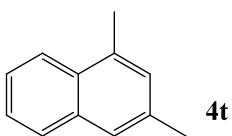

<sup>1</sup>H NMR (300 MHz, CDCl<sub>3</sub>)

SpinWorks 2.5: STANDARD 1H OBSERVE

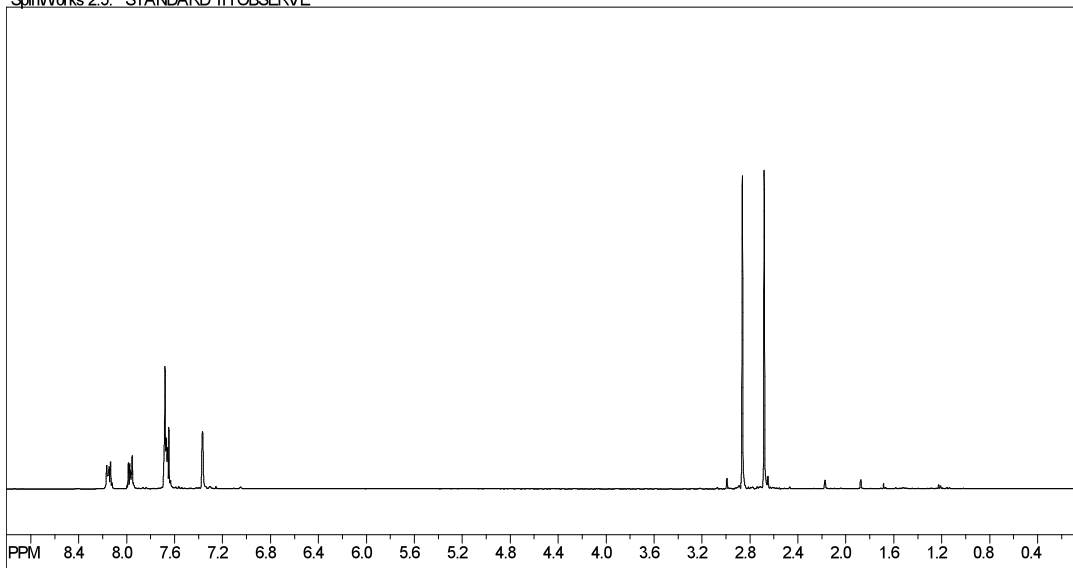

file: C:\Users\Do\Weon\Lee\Desktop\Do\W\Lee\NMR Data\LEE\lee0615-1-1H.fid\fid block# 1 expt: "s2pu"  
transmitter freq: 300.133009 MHz  
time domain size: 19192 points  
width: 4933.07 Hz = 16.003151 ppm = 0.250264 Hz/pt  
number of scans: 8

freq of 0 ppm: 300.131208 MHz  
processed size: 32768 complex points  
LB: 0.500 GB: 0.0000

<sup>13</sup>C{<sup>1</sup>H} NMR (76 MHz, CDCl<sub>3</sub>)

SpinWorks 2.5: 13C OBSERVE

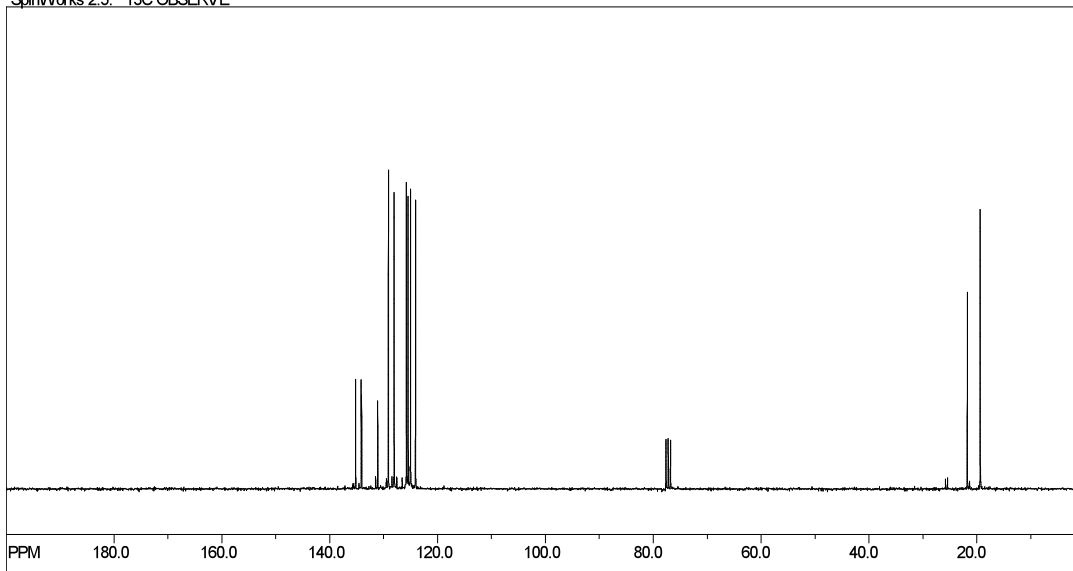

file: C:\Users\Do\Woon\Lee\Desktop\Do\Woon\Lee\NMR Data\DEE\deee0615-1-13C.fid\fid block# 1 expt: "s2pul" freq. of 0 ppm: 75.469256 MHz  
transmitter freq.: 75.478336 MHz processed size: 131072 complex points  
time domain size: 68492 points LB: 0.500 GB: 0.0000  
width: 18967.92 Hz = 249.984639 ppm = 0.275476 Hz/pt  
number of scans: 256

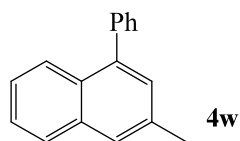

<sup>1</sup>H NMR (400 MHz, CDCl<sub>3</sub>)

SpinWorks 2.5: Std proton

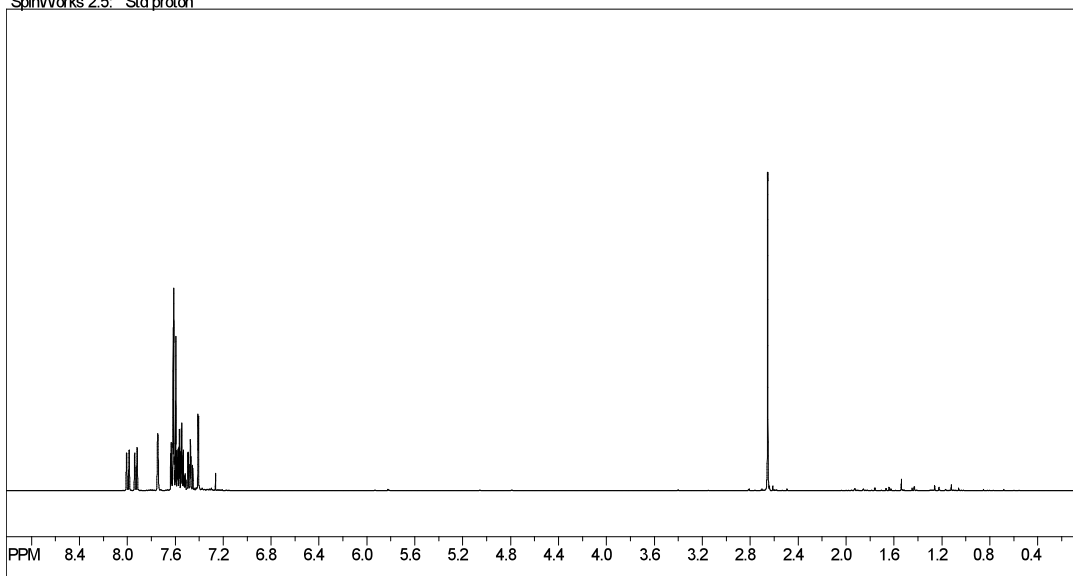

file: C:\Users\Do\Woon\Lee\Desktop\Do\Woon\Lee\NMR Data\DEE\Benzophenone-isobutylene-1-0626-1H.fid\fid block# 0 expt: "s2pul" freq. of 0 ppm: 399.713477 MHz  
transmitter freq.: 399.745775 MHz processed size: 65536 complex points  
time domain size: 2284 points LB: 0.500 GB: 0.0000  
width: 6410.26 Hz = 16.035829 ppm = 0.244070 Hz/pt  
number of scans: 8

$^{13}\text{C}\{^1\text{H}\}$  NMR (100 MHz,  $\text{CDCl}_3$ )

SpinWorks 2.5: Std carbon

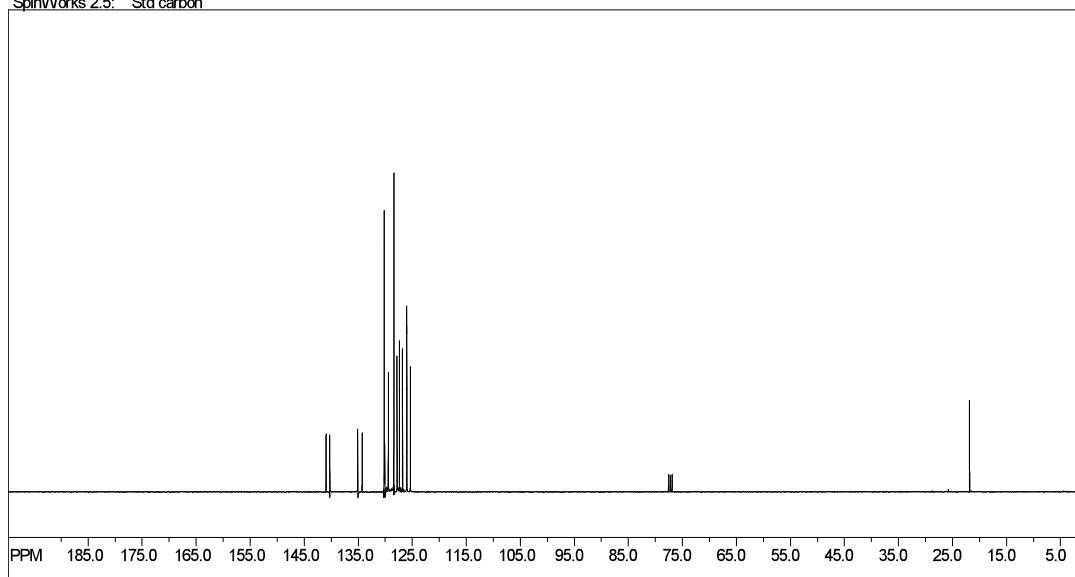

file: C:\Users\DoWoon.Lee\Desktop\DoW.Lee\NMR Data\LEE\Benzophenone-*isobutylene*-1-0626-13C.fid\fid#01.ppt 100.626571 MHz  
transmitter freq: 100.626131 MHz  
time domain size: 65750 points  
width: 24509.80 Hz = 243.815251 ppm = 0.384468 Hz/pt  
processed size: 65536 complex points  
LB: 0.500 GB 0.0000  
number of scans: 256
